# Supplementary material for: Lower-limb sagittal joint angles during gait can be predicted based on foot acceleration and angular velocity
Source: PeerJ. 2023 Sep 18;11:e16131. doi: 10.7717/peerj.16131 (PMC10512936; doi:10.7717/peerj.16131)
Supplement: Supplemental Information 1 — The yellow highlighted letters indicate optimal hyperparameters in the present study. [file peerj-11-16131-s001.xlsx]

## Sheet: History1_AE_val_AC_OM
	Appendix A
	Number of hidden layers	Number of nodes in hidden layers	Batch size	Drop rate	Learning rate
	3	160, 80, 40	128	0	0.01
	3	120, 60, 30	256	0.25	0.001
	3	80, 40, 20	512	0.5	0.0001
	3	40, 20, 20
	2	80, 40
	2	60, 30
	2	40, 20
	2	20, 20
	1	80
	1	60
	1	40
	1	20
	HL1_BS1_DR1_LR1	HL2_BS1_DR1_LR1	HL3_BS1_DR1_LR1	HL4_BS1_DR1_LR1	HL5_BS1_DR1_LR1	HL6_BS1_DR1_LR1	HL7_BS1_DR1_LR1	HL8_BS1_DR1_LR1	HL9_BS1_DR1_LR1	HL10_BS1_DR1_LR1	HL11_BS1_DR1_LR1	HL12_BS1_DR1_LR1	HL1_BS2_DR1_LR1	HL2_BS2_DR1_LR1	HL3_BS2_DR1_LR1	HL4_BS2_DR1_LR1	HL5_BS2_DR1_LR1	HL6_BS2_DR1_LR1	HL7_BS2_DR1_LR1	HL8_BS2_DR1_LR1	HL9_BS2_DR1_LR1	HL10_BS2_DR1_LR1	HL11_BS2_DR1_LR1	HL12_BS2_DR1_LR1	HL1_BS3_DR1_LR1	HL2_BS3_DR1_LR1	HL3_BS3_DR1_LR1	HL4_BS3_DR1_LR1	HL5_BS3_DR1_LR1	HL6_BS3_DR1_LR1	HL7_BS3_DR1_LR1	HL8_BS3_DR1_LR1	HL9_BS3_DR1_LR1	HL10_BS3_DR1_LR1	HL11_BS3_DR1_LR1	HL12_BS3_DR1_LR1	HL1_BS1_DR2_LR1	HL2_BS1_DR2_LR1	HL3_BS1_DR2_LR1	HL4_BS1_DR2_LR1	HL5_BS1_DR2_LR1	HL6_BS1_DR2_LR1	HL7_BS1_DR2_LR1	HL8_BS1_DR2_LR1	HL9_BS1_DR2_LR1	HL10_BS1_DR2_LR1	HL11_BS1_DR2_LR1	HL12_BS1_DR2_LR1	HL1_BS2_DR2_LR1
1	0.703982	0.727392	0.759034	0.78414	0.72984	0.752915	0.7862	0.805369	0.708933	0.74375	0.780959	0.820587	0.727713	0.742886	0.780656	0.805583	0.763218	0.78845	0.80235	0.822152	0.768875	0.802687	0.854033	0.89479	0.744529	0.762318	0.798958	0.81244	0.789171	0.805444	0.827079	0.835099	0.832703	0.857278	0.907935	0.930675	0.723558	0.755387	0.790119	0.810743	0.762956	0.785003	0.804171	0.813132	0.712404	0.751128	0.780296	0.829763	0.758544
2	0.682338	0.696408	0.728888	0.754693	0.691706	0.709187	0.749999	0.779941	0.677675	0.690097	0.711875	0.764611	0.690541	0.708778	0.754055	0.789266	0.71718	0.748656	0.77278	0.798232	0.69496	0.721755	0.770773	0.817705	0.70892	0.729239	0.771472	0.797996	0.745814	0.774385	0.799843	0.811146	0.745132	0.767819	0.816969	0.854441	0.691271	0.718479	0.76041	0.800775	0.707049	0.744761	0.785297	0.795328	0.661522	0.682562	0.713131	0.777516	0.705732
3	0.676015	0.6891	0.713265	0.736538	0.681001	0.685499	0.727459	0.761207	0.662368	0.665002	0.687665	0.73756	0.672305	0.687439	0.730863	0.776851	0.700156	0.724853	0.753232	0.784908	0.678821	0.691787	0.730508	0.781623	0.691494	0.708378	0.756267	0.784801	0.719484	0.754079	0.782315	0.797949	0.702902	0.720444	0.76631	0.80992	0.673982	0.702425	0.738701	0.783238	0.675652	0.708985	0.762002	0.778638	0.642121	0.654596	0.67947	0.750351	0.685937
4	0.685216	0.688183	0.702513	0.721402	0.679018	0.680874	0.70839	0.741205	0.656474	0.654553	0.677229	0.716665	0.675989	0.683833	0.718536	0.760278	0.6888	0.705729	0.740762	0.775901	0.671675	0.677731	0.70453	0.759933	0.682204	0.692304	0.742136	0.774935	0.706971	0.74057	0.768673	0.787547	0.684853	0.695961	0.73556	0.782539	0.667692	0.687861	0.722843	0.765774	0.664822	0.689657	0.737257	0.761179	0.637782	0.644413	0.65896	0.727111	0.677276
5	0.690297	0.694547	0.696772	0.714354	0.684221	0.681335	0.698982	0.723325	0.657227	0.652633	0.672798	0.698144	0.677618	0.683257	0.709815	0.74712	0.679757	0.691587	0.726783	0.766987	0.664046	0.667729	0.68685	0.744329	0.674362	0.68109	0.728426	0.767032	0.699693	0.731294	0.759381	0.778729	0.679007	0.683227	0.716037	0.763983	0.661069	0.679127	0.710659	0.754109	0.656978	0.676521	0.719107	0.746243	0.636704	0.641129	0.647246	0.706649	0.668183
6	0.69454	0.699283	0.694537	0.702864	0.687747	0.683079	0.692484	0.707501	0.663197	0.65773	0.671956	0.684526	0.681267	0.684914	0.701667	0.736456	0.679021	0.68647	0.714131	0.756302	0.659344	0.662886	0.674915	0.732046	0.674102	0.678963	0.721313	0.758058	0.691827	0.722252	0.752058	0.771089	0.676276	0.676491	0.703098	0.750222	0.66128	0.671233	0.702628	0.746162	0.652929	0.667691	0.706296	0.7333	0.637568	0.639224	0.643657	0.691931	0.662334
7	0.700817	0.70812	0.696249	0.702964	0.693372	0.68973	0.685358	0.697434	0.671065	0.660688	0.672421	0.675362	0.687277	0.694193	0.696219	0.729555	0.68077	0.683266	0.702646	0.745135	0.658116	0.660519	0.668632	0.720961	0.675342	0.67994	0.713362	0.751784	0.68557	0.71414	0.744642	0.763911	0.673124	0.671448	0.693926	0.739166	0.662211	0.667401	0.693961	0.737106	0.648341	0.657288	0.695707	0.722747	0.639036	0.639584	0.642524	0.679619	0.66181
8	0.700911	0.710898	0.697585	0.697556	0.705291	0.696321	0.681004	0.691573	0.674718	0.664898	0.675327	0.669865	0.690943	0.702019	0.697848	0.723526	0.687341	0.682491	0.693931	0.73551	0.657784	0.659317	0.666086	0.71082	0.677098	0.679503	0.705998	0.745815	0.684851	0.70604	0.735795	0.756739	0.669347	0.667787	0.686452	0.729859	0.662624	0.66418	0.688002	0.729404	0.649335	0.654807	0.688667	0.711521	0.639861	0.640114	0.640924	0.670995	0.661925
9	0.708413	0.718959	0.708146	0.696285	0.710175	0.69939	0.679859	0.687398	0.68444	0.671181	0.678831	0.66797	0.695162	0.703155	0.699742	0.718835	0.691015	0.681448	0.686513	0.727314	0.660476	0.659346	0.66471	0.702091	0.680925	0.679893	0.702726	0.739123	0.684536	0.699273	0.726626	0.748975	0.665376	0.665168	0.679517	0.72217	0.661693	0.666008	0.686529	0.722605	0.651076	0.653585	0.681401	0.70362	0.64031	0.638589	0.639435	0.664168	0.658944
10	0.712265	0.719247	0.708478	0.698261	0.714073	0.708968	0.683207	0.681054	0.690546	0.677619	0.681369	0.666157	0.703522	0.710459	0.699347	0.715521	0.694046	0.682842	0.682251	0.719802	0.666336	0.660531	0.663182	0.695451	0.68827	0.683962	0.69824	0.734397	0.684198	0.695385	0.718418	0.741209	0.662447	0.66292	0.67437	0.715673	0.661156	0.661443	0.682085	0.715677	0.649946	0.650819	0.676767	0.698844	0.642405	0.639022	0.63989	0.660792	0.657515
11	0.71606	0.73026	0.719226	0.70012	0.718474	0.712129	0.686599	0.679821	0.697522	0.680479	0.685003	0.666614	0.70644	0.717561	0.702548	0.712101	0.701236	0.684909	0.679591	0.71457	0.67066	0.662447	0.662481	0.690125	0.689776	0.687659	0.695905	0.730923	0.687054	0.693609	0.712326	0.734374	0.660726	0.660998	0.670693	0.709773	0.664149	0.665438	0.680927	0.710695	0.647959	0.65577	0.675781	0.692775	0.644496	0.641159	0.64177	0.658801	0.659295
12	0.715259	0.731103	0.720967	0.702859	0.720332	0.716486	0.69323	0.678673	0.70263	0.687957	0.688738	0.666108	0.710197	0.724571	0.706961	0.712549	0.703982	0.689128	0.678065	0.709103	0.674775	0.666144	0.663584	0.685409	0.692886	0.691344	0.694516	0.726155	0.690501	0.692532	0.707274	0.728334	0.66059	0.660187	0.66816	0.704228	0.662946	0.667252	0.675979	0.707641	0.64977	0.654064	0.676072	0.689961	0.64429	0.642489	0.642603	0.657539	0.65984
13	0.715917	0.73631	0.725212	0.703759	0.723041	0.722185	0.694488	0.678759	0.706554	0.693599	0.691956	0.665659	0.713841	0.727793	0.707109	0.709977	0.709847	0.693569	0.679186	0.704921	0.679569	0.670108	0.664834	0.680985	0.695346	0.696778	0.695099	0.723955	0.692167	0.692123	0.702853	0.722342	0.661985	0.660424	0.666297	0.698961	0.664942	0.66453	0.674144	0.704208	0.652233	0.652638	0.671917	0.686963	0.646696	0.645046	0.641749	0.657603	0.656588
14	0.721526	0.735675	0.731706	0.705723	0.726919	0.725926	0.697338	0.677008	0.710698	0.696733	0.692517	0.666855	0.718842	0.732019	0.713858	0.708539	0.716348	0.700394	0.683046	0.700628	0.684644	0.672104	0.666819	0.677951	0.70213	0.7007	0.696157	0.722551	0.695626	0.691803	0.699741	0.717072	0.664291	0.661373	0.665215	0.694069	0.669328	0.663284	0.674952	0.701272	0.650604	0.653521	0.671477	0.685067	0.648272	0.644317	0.642843	0.656403	0.654682
15	0.723696	0.741991	0.731262	0.705726	0.727259	0.729801	0.700714	0.679863	0.716219	0.698386	0.695933	0.665692	0.720947	0.738853	0.715924	0.708756	0.716299	0.702724	0.682629	0.697861	0.689396	0.675044	0.668078	0.675858	0.707132	0.701171	0.697587	0.718648	0.699129	0.692117	0.697079	0.711654	0.667709	0.662536	0.664595	0.689641	0.66517	0.664173	0.673817	0.699635	0.65327	0.656848	0.669932	0.682812	0.650677	0.645722	0.64355	0.65551	0.657207
16	0.723563	0.73949	0.73135	0.711142	0.733078	0.731311	0.704435	0.680165	0.718566	0.703472	0.700375	0.664584	0.726356	0.739833	0.719542	0.710704	0.722515	0.706268	0.689322	0.694157	0.694168	0.679403	0.670155	0.674021	0.705877	0.706462	0.699221	0.717889	0.703235	0.693111	0.695258	0.706817	0.67114	0.663807	0.664729	0.685643	0.666312	0.66533	0.673345	0.698906	0.653233	0.65638	0.667748	0.682473	0.650507	0.647749	0.643621	0.656203	0.657939
17	0.725956	0.745479	0.739174	0.716092	0.734696	0.734892	0.7067	0.682437	0.722135	0.709358	0.700218	0.665552	0.72463	0.743622	0.726504	0.715974	0.726101	0.71197	0.686635	0.693008	0.697284	0.682637	0.672885	0.673099	0.710503	0.71243	0.704207	0.715039	0.706283	0.69512	0.692976	0.703438	0.674125	0.665879	0.664716	0.681884	0.669753	0.664975	0.673019	0.695401	0.651907	0.653295	0.666931	0.682161	0.650401	0.647648	0.643869	0.655195	0.65833
18	0.728894	0.742149	0.742317	0.714713	0.737481	0.736008	0.71123	0.683742	0.724542	0.709022	0.704854	0.66449	0.732277	0.746676	0.728788	0.714693	0.729746	0.715486	0.692963	0.68992	0.700592	0.688291	0.675036	0.672668	0.713073	0.717072	0.707967	0.713739	0.70777	0.695683	0.690683	0.700009	0.67655	0.667983	0.665021	0.678479	0.666771	0.666796	0.672569	0.692065	0.654638	0.653034	0.665628	0.678368	0.653637	0.649412	0.645364	0.6552	0.657795
19	0.730728	0.74939	0.746067	0.718276	0.738069	0.737951	0.713983	0.683248	0.727897	0.712443	0.705571	0.66401	0.730925	0.749512	0.729109	0.715937	0.731284	0.715982	0.694183	0.689886	0.703555	0.691704	0.677509	0.671988	0.716288	0.720841	0.710285	0.710273	0.710566	0.69833	0.690697	0.696372	0.679392	0.669979	0.665784	0.675859	0.671817	0.66582	0.671832	0.690007	0.658306	0.65507	0.665617	0.67686	0.653417	0.648244	0.646439	0.654995	0.658311
20	0.731599	0.746363	0.741305	0.716347	0.738671	0.743369	0.715484	0.679684	0.731118	0.713022	0.706744	0.66638	0.728867	0.754705	0.732891	0.715447	0.735533	0.720865	0.695032	0.689338	0.706472	0.694026	0.679976	0.670941	0.717429	0.723837	0.715934	0.71006	0.712153	0.699973	0.692178	0.692624	0.682651	0.672447	0.666295	0.673918	0.6685	0.667931	0.670388	0.687163	0.657006	0.657139	0.664964	0.67597	0.654484	0.648994	0.646887	0.654118	0.660944
21	0.734781	0.755579	0.742881	0.723201	0.746897	0.744774	0.714708	0.682028	0.735558	0.717209	0.708432	0.665531	0.734597	0.756046	0.736069	0.716249	0.740229	0.724492	0.696853	0.688018	0.709089	0.696839	0.6833	0.670005	0.720044	0.727243	0.715326	0.70706	0.715922	0.699749	0.692987	0.689513	0.685751	0.674932	0.666724	0.672571	0.665987	0.669474	0.670529	0.690099	0.657864	0.655311	0.665678	0.675678	0.655547	0.650518	0.647599	0.655003	0.664506
22	0.736229	0.749265	0.745665	0.720618	0.745582	0.746472	0.716123	0.682296	0.736803	0.718478	0.713584	0.663681	0.736012	0.758522	0.740972	0.72007	0.74025	0.72571	0.699189	0.6877	0.712824	0.701393	0.685209	0.668374	0.721183	0.732921	0.723211	0.704438	0.718086	0.702532	0.693906	0.686999	0.68881	0.677721	0.667347	0.671386	0.666272	0.66982	0.671021	0.689477	0.658043	0.658633	0.668338	0.675009	0.657379	0.652858	0.648781	0.655778	0.663747
23	0.73711	0.755898	0.750495	0.725557	0.750626	0.749422	0.718662	0.686873	0.74115	0.723317	0.71295	0.665474	0.738597	0.764119	0.744728	0.721629	0.743264	0.728313	0.701554	0.684935	0.713811	0.703802	0.686773	0.668612	0.7225	0.735374	0.726821	0.704404	0.719657	0.705597	0.694934	0.685354	0.692054	0.681379	0.668438	0.670342	0.670417	0.669186	0.67031	0.688023	0.660144	0.657706	0.667416	0.67644	0.658027	0.653653	0.651101	0.654016	0.662438
24	0.737815	0.754713	0.751287	0.725757	0.751129	0.749223	0.723368	0.685861	0.739312	0.725033	0.714071	0.665886	0.740055	0.765002	0.747744	0.719232	0.7481	0.731788	0.70056	0.685579	0.715835	0.705641	0.690185	0.668919	0.722081	0.739985	0.731751	0.702025	0.721056	0.708032	0.694255	0.684452	0.695078	0.684399	0.669779	0.669689	0.672549	0.671713	0.669646	0.686477	0.661017	0.65854	0.667181	0.674734	0.659634	0.654415	0.653045	0.654591	0.665063
25	0.739774	0.758678	0.748614	0.726931	0.757324	0.754955	0.725901	0.687124	0.743181	0.725495	0.710875	0.666305	0.741121	0.770896	0.744689	0.723802	0.749127	0.733876	0.703651	0.686194	0.718857	0.709325	0.692357	0.66913	0.725477	0.741781	0.730008	0.703187	0.723209	0.710478	0.695629	0.683228	0.697448	0.687007	0.6714	0.669758	0.665891	0.670048	0.669168	0.686363	0.659508	0.661547	0.668242	0.674691	0.661267	0.657145	0.651605	0.656777	0.666504
26	0.738748	0.757254	0.752828	0.730449	0.754272	0.752176	0.728383	0.689971	0.745277	0.726713	0.716171	0.667306	0.743497	0.769503	0.750709	0.725656	0.752172	0.738177	0.705929	0.685024	0.720716	0.712371	0.694316	0.66786	0.730715	0.744153	0.734895	0.704156	0.725909	0.712607	0.695679	0.68228	0.699389	0.689825	0.673528	0.669835	0.670925	0.671346	0.670722	0.686391	0.662018	0.660456	0.66683	0.67309	0.6624	0.655606	0.652712	0.656599	0.663893
27	0.741331	0.757194	0.75834	0.728866	0.758972	0.754532	0.73073	0.688311	0.744954	0.72944	0.717324	0.666948	0.742294	0.772207	0.751541	0.72449	0.753749	0.741226	0.707014	0.6834	0.722674	0.713744	0.69791	0.666969	0.730195	0.752717	0.738665	0.703659	0.727835	0.715392	0.696439	0.682205	0.701714	0.692505	0.674908	0.669679	0.666207	0.67172	0.671122	0.684759	0.663538	0.660479	0.666567	0.670698	0.663751	0.65602	0.650448	0.655486	0.663868
28	0.740867	0.760437	0.755639	0.733236	0.760656	0.757592	0.727925	0.686471	0.74736	0.730594	0.721276	0.666401	0.74675	0.773961	0.75649	0.727461	0.755862	0.742629	0.709941	0.684875	0.724955	0.716751	0.698174	0.667439	0.734524	0.751496	0.739314	0.704087	0.729807	0.717306	0.699697	0.681612	0.705218	0.695231	0.676059	0.669384	0.670838	0.671545	0.670677	0.684706	0.660755	0.661612	0.667974	0.671971	0.662778	0.657911	0.652764	0.655145	0.661926
29	0.744568	0.757939	0.76037	0.729794	0.76064	0.756128	0.730086	0.686315	0.748853	0.732684	0.719711	0.669144	0.743705	0.777003	0.756404	0.726978	0.759973	0.743388	0.710334	0.682965	0.724945	0.718454	0.699067	0.667232	0.732771	0.753878	0.747123	0.705556	0.730144	0.718968	0.699411	0.680039	0.707257	0.69779	0.677422	0.668928	0.670326	0.672456	0.674183	0.682701	0.662518	0.661988	0.666744	0.670944	0.664454	0.659694	0.655558	0.654968	0.662931
30	0.745721	0.763214	0.756429	0.732866	0.764887	0.760793	0.731338	0.688285	0.753234	0.732386	0.722617	0.66969	0.749079	0.777706	0.759256	0.732201	0.761467	0.74556	0.711341	0.683822	0.72845	0.719823	0.702066	0.667018	0.738338	0.758504	0.745871	0.705004	0.732698	0.719904	0.700008	0.680886	0.70751	0.700212	0.679183	0.669095	0.671034	0.671197	0.671534	0.683608	0.663942	0.659416	0.668032	0.669812	0.666972	0.658922	0.654955	0.654724	0.665197
31	0.745902	0.763504	0.763538	0.730412	0.768093	0.761912	0.730516	0.6858	0.752367	0.734569	0.720486	0.666654	0.746279	0.782854	0.759478	0.732298	0.763474	0.745781	0.711964	0.683074	0.729749	0.722611	0.704672	0.666857	0.735743	0.761162	0.75303	0.707684	0.737362	0.718993	0.700868	0.680467	0.708587	0.701415	0.680499	0.668993	0.673026	0.669872	0.671822	0.681928	0.665475	0.663104	0.669776	0.669677	0.66502	0.659698	0.655832	0.65455	0.665378
32	0.749981	0.76592	0.760816	0.738617	0.768568	0.764077	0.733292	0.690468	0.753608	0.735536	0.722437	0.66918	0.749835	0.78302	0.765473	0.733033	0.767759	0.748893	0.7154	0.683764	0.731053	0.724228	0.70509	0.666842	0.737991	0.758321	0.751384	0.707591	0.738868	0.722168	0.702176	0.679957	0.710477	0.703318	0.682039	0.668644	0.673229	0.673363	0.673212	0.681904	0.666727	0.662787	0.670942	0.671468	0.667517	0.661473	0.656665	0.654419	0.663924
33	0.748601	0.764268	0.763532	0.733235	0.771343	0.766059	0.730389	0.690377	0.755428	0.736559	0.723757	0.671665	0.74918	0.786516	0.763883	0.732699	0.767345	0.754583	0.718803	0.6836	0.733405	0.726078	0.705832	0.666614	0.739869	0.760045	0.757023	0.71102	0.738991	0.723342	0.701081	0.678217	0.713323	0.704814	0.684391	0.668037	0.671431	0.67159	0.672111	0.68267	0.665901	0.661836	0.670841	0.669723	0.667834	0.663678	0.655901	0.65333	0.666167
34	0.749066	0.762594	0.760878	0.732407	0.771153	0.763066	0.734509	0.689689	0.754882	0.733875	0.724315	0.667314	0.750482	0.787314	0.764776	0.732696	0.770174	0.754426	0.717653	0.685329	0.732967	0.726668	0.707719	0.667157	0.741772	0.765494	0.754865	0.710754	0.740615	0.726458	0.704959	0.677416	0.715369	0.70613	0.686565	0.667641	0.673004	0.67289	0.671362	0.682015	0.665469	0.663107	0.669344	0.667747	0.66946	0.664386	0.657305	0.65513	0.667109
35	0.747291	0.7686	0.764691	0.738155	0.772533	0.763498	0.731643	0.689492	0.756598	0.738192	0.724929	0.670733	0.753707	0.788648	0.768027	0.737809	0.76898	0.753175	0.719105	0.683546	0.737158	0.728898	0.707789	0.667311	0.7424	0.769239	0.758596	0.712197	0.740412	0.728288	0.705257	0.676339	0.715516	0.70813	0.688232	0.667196	0.673532	0.671423	0.673113	0.680893	0.666875	0.662241	0.669269	0.666286	0.670238	0.664394	0.657385	0.65629	0.664042
36	0.75276	0.769269	0.769255	0.739422	0.771826	0.769168	0.733265	0.689835	0.757369	0.738078	0.724728	0.668555	0.752936	0.789416	0.773253	0.740033	0.772133	0.755984	0.718718	0.685612	0.737258	0.730506	0.71036	0.66705	0.742974	0.767303	0.761342	0.713066	0.746004	0.732062	0.70633	0.675802	0.716874	0.71	0.688683	0.667047	0.674331	0.673722	0.671559	0.682554	0.664266	0.662978	0.671311	0.66657	0.671797	0.665283	0.659364	0.656015	0.663266
37	0.751097	0.766435	0.768325	0.738287	0.775838	0.765977	0.734795	0.694078	0.758395	0.740001	0.72639	0.670278	0.753863	0.788407	0.769494	0.73704	0.777705	0.75915	0.723414	0.684905	0.739713	0.733521	0.710571	0.667604	0.745338	0.766673	0.76309	0.713308	0.744579	0.732931	0.706214	0.675769	0.719007	0.712042	0.689193	0.666837	0.670388	0.672681	0.674001	0.681372	0.663949	0.663748	0.66895	0.668372	0.671512	0.665511	0.660345	0.654617	0.667409
38	0.751087	0.768124	0.765396	0.741804	0.77809	0.765439	0.735333	0.691127	0.758904	0.740699	0.726735	0.671191	0.756548	0.790336	0.775253	0.740142	0.776955	0.760475	0.719722	0.682533	0.739069	0.731703	0.712688	0.6674	0.745383	0.773353	0.76469	0.714485	0.747761	0.736633	0.706129	0.675218	0.721257	0.713524	0.69084	0.667225	0.673148	0.673796	0.673591	0.68207	0.665125	0.665563	0.671474	0.66753	0.671739	0.665659	0.65787	0.655794	0.667676
39	0.751587	0.77033	0.769901	0.740322	0.776705	0.765968	0.739213	0.690783	0.759777	0.740897	0.728784	0.671076	0.75397	0.792934	0.775771	0.742956	0.776733	0.758455	0.724721	0.687	0.741618	0.735025	0.714483	0.667479	0.745736	0.772967	0.766386	0.718256	0.749503	0.736587	0.710176	0.674694	0.723269	0.714775	0.693009	0.667554	0.675571	0.67234	0.67277	0.679417	0.66797	0.663969	0.671446	0.669407	0.672611	0.664646	0.65882	0.657141	0.665648
40	0.753202	0.772331	0.772872	0.74208	0.776785	0.766507	0.736191	0.691038	0.760776	0.741919	0.729613	0.669705	0.756637	0.795135	0.777759	0.740946	0.77754	0.764306	0.724958	0.684957	0.745065	0.735052	0.714832	0.66627	0.749462	0.776281	0.769536	0.715666	0.751246	0.738371	0.709672	0.675724	0.724456	0.716091	0.694655	0.667873	0.675014	0.67363	0.67295	0.682253	0.666195	0.663866	0.671425	0.669145	0.673272	0.66574	0.661862	0.656811	0.666642
41	0.753559	0.76627	0.773379	0.739908	0.779572	0.767372	0.737988	0.69266	0.76276	0.741966	0.728499	0.672451	0.757376	0.793705	0.779395	0.743296	0.77988	0.763064	0.723895	0.685435	0.74302	0.73806	0.715461	0.667227	0.748826	0.77663	0.769438	0.719151	0.7518	0.738206	0.710411	0.675755	0.724195	0.718267	0.696498	0.668203	0.675214	0.673939	0.672361	0.681822	0.66945	0.66393	0.67124	0.66912	0.673506	0.668343	0.660384	0.655752	0.664691
42	0.755471	0.771486	0.771769	0.743776	0.782047	0.772553	0.738802	0.693789	0.763222	0.741943	0.728829	0.670257	0.757814	0.79727	0.780873	0.741822	0.783047	0.76414	0.726221	0.687112	0.744182	0.739535	0.715977	0.667677	0.750809	0.77919	0.771094	0.719931	0.757183	0.741659	0.710263	0.673483	0.72513	0.720428	0.69823	0.668418	0.671978	0.673007	0.676335	0.681406	0.67048	0.665769	0.669544	0.668644	0.673818	0.666415	0.661492	0.654462	0.663294
43	0.753099	0.770783	0.77647	0.743262	0.78104	0.767452	0.741152	0.693222	0.762491	0.743505	0.731607	0.670097	0.758956	0.799216	0.780653	0.741349	0.782514	0.766831	0.725583	0.685334	0.744421	0.741133	0.716489	0.666942	0.750942	0.778402	0.772694	0.719724	0.755243	0.740989	0.715045	0.675024	0.72702	0.721976	0.699098	0.66844	0.672113	0.676006	0.675687	0.678622	0.668036	0.666501	0.671569	0.666982	0.676638	0.668245	0.661972	0.653435	0.66428
44	0.752874	0.77037	0.774631	0.742786	0.78269	0.77163	0.737611	0.693709	0.763496	0.745102	0.730685	0.670833	0.757832	0.798872	0.786804	0.745484	0.785227	0.769466	0.727827	0.688006	0.747993	0.742547	0.71775	0.666348	0.752532	0.781022	0.773817	0.723967	0.756754	0.744132	0.710282	0.675833	0.730781	0.722865	0.700319	0.668031	0.674666	0.67374	0.676091	0.679261	0.668643	0.667195	0.673818	0.666167	0.676412	0.669025	0.660625	0.65467	0.663425
45	0.755943	0.773599	0.777519	0.743296	0.783595	0.773141	0.741563	0.692972	0.76619	0.743578	0.731136	0.671707	0.758124	0.800422	0.785054	0.742836	0.785929	0.768351	0.727415	0.688793	0.749685	0.740209	0.719308	0.666913	0.750149	0.782503	0.776059	0.723567	0.757408	0.742553	0.715746	0.677153	0.733012	0.724239	0.701596	0.667781	0.6756	0.677869	0.676277	0.678575	0.669597	0.668178	0.673847	0.666525	0.675404	0.671288	0.661087	0.655962	0.663218
46	0.755079	0.775134	0.78089	0.747922	0.785059	0.775252	0.743115	0.696437	0.765525	0.74579	0.732426	0.671224	0.758425	0.800937	0.786762	0.742272	0.785085	0.767406	0.729012	0.687824	0.747884	0.744379	0.720701	0.668732	0.752612	0.785447	0.778115	0.724178	0.757914	0.747035	0.712438	0.675683	0.734007	0.72505	0.703058	0.667853	0.674288	0.677255	0.676606	0.67829	0.669373	0.668594	0.672813	0.668047	0.675967	0.672357	0.660225	0.65691	0.66419
47	0.757208	0.774367	0.776326	0.743088	0.785265	0.772887	0.744292	0.69675	0.766027	0.747026	0.730542	0.672498	0.760836	0.803395	0.78786	0.746463	0.785768	0.769931	0.732531	0.689403	0.750365	0.745746	0.72048	0.668989	0.755177	0.786275	0.778036	0.72447	0.76146	0.744561	0.716608	0.678551	0.734324	0.72634	0.704093	0.66827	0.673152	0.676377	0.675741	0.677218	0.669458	0.667042	0.673198	0.666985	0.676405	0.670473	0.661868	0.655691	0.665387
48	0.756152	0.77104	0.777431	0.747415	0.786382	0.775399	0.746237	0.695908	0.767391	0.747228	0.731849	0.674227	0.758972	0.801773	0.788136	0.747506	0.789565	0.771895	0.730286	0.687942	0.751653	0.747113	0.720885	0.668251	0.754705	0.784547	0.780273	0.729175	0.760085	0.74716	0.717085	0.67678	0.734915	0.728673	0.705237	0.668474	0.678296	0.675417	0.677636	0.676812	0.670315	0.66872	0.671743	0.667727	0.681332	0.671195	0.663175	0.656818	0.664762
49	0.758214	0.777263	0.780919	0.746646	0.789698	0.772032	0.743466	0.697951	0.768538	0.7486	0.734461	0.671838	0.760966	0.804595	0.791194	0.745422	0.791562	0.774136	0.730331	0.689248	0.752337	0.746041	0.722356	0.668957	0.754562	0.786252	0.781259	0.727637	0.762185	0.745516	0.716328	0.678552	0.735454	0.729961	0.706004	0.668713	0.674254	0.677359	0.678307	0.67741	0.671683	0.66778	0.670287	0.66776	0.679608	0.672285	0.662985	0.65721	0.664613
50	0.75732	0.773268	0.781478	0.745366	0.787896	0.777509	0.744545	0.693382	0.768636	0.751047	0.733235	0.672411	0.761445	0.804765	0.793981	0.746507	0.79322	0.773658	0.733152	0.691209	0.751958	0.748143	0.72404	0.668372	0.758285	0.789024	0.782735	0.728964	0.764255	0.748836	0.715577	0.677697	0.736621	0.731335	0.708514	0.668856	0.677033	0.678051	0.674909	0.677421	0.671009	0.670077	0.673048	0.668196	0.67959	0.671377	0.662737	0.657149	0.665981
51	0.755574	0.777752	0.783095	0.750245	0.788428	0.77345	0.741958	0.695541	0.766439	0.749229	0.731264	0.670738	0.762244	0.808037	0.792907	0.751055	0.793215	0.772721	0.734149	0.689195	0.754754	0.749038	0.723907	0.668326	0.758677	0.787851	0.783896	0.72942	0.764895	0.749415	0.718631	0.678312	0.737688	0.731306	0.710883	0.669201	0.678386	0.679297	0.674826	0.676849	0.670405	0.66705	0.67399	0.667539	0.680307	0.671787	0.662751	0.655257	0.666835
52	0.757058	0.778077	0.782253	0.748211	0.788722	0.774767	0.74105	0.698064	0.77088	0.747985	0.734748	0.675669	0.761858	0.806876	0.793864	0.750561	0.793553	0.77644	0.73273	0.690237	0.754876	0.750574	0.725173	0.670761	0.756674	0.790725	0.784677	0.735171	0.766021	0.7502	0.718571	0.678997	0.737807	0.732423	0.710821	0.670003	0.67753	0.679715	0.676722	0.678515	0.670067	0.667045	0.674791	0.665391	0.68034	0.671292	0.665695	0.655853	0.667406
53	0.75681	0.776531	0.779963	0.746483	0.793467	0.775945	0.743377	0.697004	0.769548	0.751168	0.733453	0.670448	0.757876	0.808321	0.799529	0.747993	0.795246	0.777878	0.734772	0.688921	0.756077	0.750432	0.725774	0.671009	0.760204	0.793612	0.788219	0.728962	0.766676	0.749358	0.723526	0.677661	0.739601	0.733818	0.710985	0.669617	0.677251	0.67698	0.67595	0.676884	0.672057	0.667606	0.674378	0.665559	0.681336	0.67282	0.665165	0.656437	0.666206
54	0.757112	0.776686	0.782442	0.748364	0.792031	0.776352	0.744033	0.697575	0.77003	0.749873	0.73785	0.671823	0.762341	0.807283	0.798149	0.750843	0.793642	0.777649	0.738072	0.688868	0.757377	0.752009	0.725516	0.670463	0.758999	0.792585	0.787381	0.736106	0.7705	0.752183	0.72187	0.680403	0.742026	0.734551	0.711468	0.668982	0.678619	0.676893	0.67648	0.677437	0.670203	0.666662	0.67366	0.666653	0.683759	0.67245	0.66501	0.657319	0.664516
55	0.757391	0.774507	0.785061	0.750669	0.795287	0.778233	0.744417	0.69861	0.769794	0.750418	0.732402	0.675115	0.758207	0.811025	0.797443	0.749154	0.796096	0.777756	0.73713	0.693285	0.757675	0.754636	0.727151	0.669894	0.760867	0.796253	0.786926	0.733249	0.767997	0.750086	0.723982	0.680832	0.742755	0.733901	0.712575	0.668827	0.676128	0.679449	0.677681	0.677895	0.671418	0.668134	0.670902	0.667406	0.684355	0.671397	0.66603	0.656133	0.665591
56	0.757852	0.778394	0.785794	0.749488	0.791896	0.779756	0.746976	0.697855	0.772401	0.749181	0.736369	0.672255	0.764705	0.812871	0.798012	0.751443	0.799973	0.779493	0.73524	0.691945	0.760093	0.754064	0.726692	0.67045	0.763349	0.794888	0.788822	0.733683	0.769527	0.752841	0.722326	0.681499	0.744126	0.733819	0.713791	0.6684	0.679979	0.683032	0.678283	0.677252	0.668969	0.670335	0.673579	0.666705	0.685081	0.671753	0.66557	0.653274	0.665376
57	0.75573	0.778828	0.783423	0.751383	0.794169	0.782043	0.743288	0.699946	0.770978	0.751034	0.737111	0.673973	0.76181	0.814518	0.800458	0.75201	0.798189	0.77743	0.736524	0.692555	0.76009	0.75317	0.727342	0.671398	0.76456	0.79522	0.795033	0.73763	0.771915	0.754529	0.725651	0.681928	0.745278	0.736006	0.716475	0.66848	0.677573	0.681751	0.678315	0.676398	0.672333	0.669342	0.674825	0.667389	0.685108	0.67343	0.664559	0.655143	0.666213
58	0.757956	0.779387	0.786505	0.748606	0.794742	0.778922	0.746533	0.701106	0.77351	0.751532	0.735271	0.676103	0.765787	0.813367	0.800284	0.753635	0.798137	0.780066	0.739156	0.691702	0.759846	0.754639	0.728455	0.671296	0.765309	0.795311	0.791845	0.739075	0.773514	0.755432	0.725144	0.681748	0.744342	0.737139	0.71732	0.669119	0.680366	0.683202	0.676967	0.676196	0.672587	0.670516	0.673952	0.666227	0.683223	0.673721	0.663886	0.654766	0.666663
59	0.758678	0.778879	0.785481	0.751759	0.795786	0.784346	0.745304	0.702513	0.77208	0.753459	0.735206	0.672813	0.76689	0.815909	0.801904	0.754741	0.802222	0.780597	0.739888	0.691076	0.762656	0.757142	0.72912	0.672229	0.764042	0.796676	0.787624	0.737483	0.773902	0.754475	0.723494	0.682662	0.745542	0.738935	0.717055	0.669759	0.68132	0.684409	0.677057	0.67641	0.6728	0.669811	0.67621	0.667025	0.682696	0.674599	0.663008	0.656055	0.667463
60	0.755648	0.781524	0.786711	0.749105	0.796457	0.781104	0.744693	0.701935	0.773455	0.753663	0.738705	0.676231	0.764522	0.814863	0.799601	0.753747	0.803237	0.780391	0.739936	0.692123	0.761308	0.75691	0.728686	0.671707	0.767661	0.79993	0.793194	0.738923	0.773905	0.753252	0.7251	0.683228	0.746775	0.739875	0.717129	0.670368	0.680128	0.680957	0.678144	0.676618	0.672971	0.672322	0.675216	0.66875	0.68569	0.674464	0.667072	0.655341	0.669125
61	0.761183	0.778187	0.794262	0.7502	0.798609	0.783252	0.745667	0.699893	0.772337	0.753343	0.735453	0.6736	0.765014	0.818785	0.802587	0.750775	0.805566	0.781398	0.741193	0.691808	0.761604	0.757413	0.729525	0.671867	0.766855	0.79807	0.793618	0.741471	0.775429	0.755117	0.725697	0.683416	0.74699	0.740243	0.717155	0.670528	0.68182	0.68215	0.680884	0.676375	0.671244	0.674527	0.675243	0.667547	0.682489	0.673431	0.66535	0.655505	0.670575
62	0.758918	0.781676	0.789588	0.754108	0.797713	0.781005	0.746599	0.702096	0.773697	0.754827	0.737326	0.673742	0.767662	0.816464	0.805747	0.753433	0.805402	0.782228	0.739585	0.692697	0.763143	0.757238	0.73275	0.671118	0.767696	0.799522	0.794666	0.736936	0.777249	0.755501	0.726678	0.683523	0.749308	0.74117	0.717374	0.669443	0.679503	0.680611	0.67751	0.676963	0.670209	0.673402	0.67495	0.66716	0.683933	0.673672	0.664267	0.653892	0.668084
63	0.760421	0.780422	0.7914	0.751601	0.800665	0.782967	0.745664	0.704712	0.77543	0.752252	0.735461	0.675051	0.766087	0.8205	0.803224	0.754722	0.806069	0.783519	0.740597	0.693755	0.765345	0.75958	0.730042	0.672372	0.769438	0.802086	0.79727	0.741172	0.775418	0.758701	0.726397	0.682223	0.750749	0.741386	0.718888	0.668926	0.67946	0.683029	0.678254	0.676055	0.670507	0.674438	0.677821	0.666518	0.684053	0.675465	0.664999	0.653959	0.666875
64	0.761925	0.782978	0.787874	0.755062	0.798432	0.784154	0.747644	0.701393	0.776248	0.755663	0.73707	0.675164	0.765818	0.816826	0.808426	0.754603	0.803722	0.78454	0.740494	0.692802	0.765934	0.759382	0.731183	0.673183	0.76985	0.80383	0.792895	0.738664	0.775339	0.757589	0.7276	0.681303	0.75109	0.74204	0.719719	0.668243	0.680177	0.684767	0.679123	0.677293	0.671788	0.672499	0.675189	0.666086	0.6857	0.674288	0.668723	0.654045	0.668582
65	0.760397	0.783626	0.791218	0.752567	0.796955	0.782249	0.747765	0.7043	0.773767	0.753994	0.734471	0.672898	0.768266	0.820025	0.807043	0.759283	0.804678	0.784082	0.741538	0.692002	0.76427	0.759153	0.732321	0.673937	0.77044	0.80444	0.795406	0.741431	0.779822	0.757712	0.725737	0.681952	0.751558	0.74283	0.719486	0.667734	0.679642	0.681651	0.676527	0.677261	0.673081	0.674087	0.672992	0.667816	0.685736	0.672986	0.668264	0.653878	0.669722
66	0.761493	0.782	0.794801	0.752666	0.80075	0.78368	0.74682	0.701259	0.774271	0.756478	0.735439	0.675798	0.768139	0.819582	0.809237	0.758467	0.806371	0.78542	0.74332	0.694556	0.766988	0.76052	0.732897	0.672468	0.771862	0.804999	0.798359	0.742705	0.776702	0.759401	0.72639	0.681493	0.75056	0.744522	0.720376	0.668031	0.681561	0.68315	0.681972	0.677062	0.672258	0.676795	0.676411	0.666675	0.686154	0.672447	0.666356	0.654688	0.669607
67	0.757067	0.781931	0.79107	0.756721	0.799641	0.784022	0.748404	0.703122	0.775517	0.754334	0.734614	0.673083	0.768512	0.824482	0.808927	0.756096	0.808934	0.786087	0.742631	0.692511	0.76744	0.762936	0.733531	0.673231	0.771565	0.806463	0.797894	0.742052	0.778833	0.756377	0.726284	0.68325	0.750987	0.746139	0.72218	0.668256	0.683306	0.682536	0.679957	0.675708	0.674177	0.672403	0.675381	0.665432	0.686681	0.672151	0.664122	0.655715	0.668586
68	0.761969	0.782666	0.793981	0.750161	0.802887	0.785669	0.749311	0.700039	0.77651	0.75413	0.737433	0.675837	0.770535	0.818655	0.808325	0.755285	0.809	0.786516	0.74265	0.694462	0.766442	0.760568	0.732724	0.672637	0.77093	0.808038	0.8017	0.744335	0.779751	0.758781	0.728107	0.684806	0.752796	0.747788	0.72326	0.667677	0.68089	0.684422	0.678876	0.676634	0.671881	0.673796	0.673064	0.667853	0.685591	0.672896	0.667105	0.656354	0.666315
69	0.75813	0.777671	0.793185	0.748324	0.800403	0.788718	0.751031	0.701913	0.77449	0.756658	0.739178	0.675418	0.771756	0.82608	0.811424	0.757945	0.808521	0.787368	0.744462	0.695874	0.768266	0.762926	0.73452	0.674455	0.774925	0.807648	0.802941	0.74856	0.781153	0.758671	0.729163	0.685454	0.754042	0.747054	0.722663	0.667862	0.68321	0.685756	0.677124	0.676652	0.672906	0.672203	0.672446	0.669031	0.68652	0.671688	0.669185	0.656384	0.668279
70	0.764393	0.785082	0.794633	0.752947	0.803481	0.784315	0.750308	0.703296	0.777253	0.75801	0.735769	0.675553	0.770632	0.819937	0.809957	0.757378	0.809936	0.788555	0.745275	0.69405	0.768712	0.762702	0.732651	0.673284	0.7744	0.809561	0.803194	0.743498	0.782441	0.76007	0.72825	0.684272	0.756647	0.746492	0.722497	0.668916	0.682038	0.686217	0.679731	0.675241	0.672996	0.673795	0.675357	0.666408	0.68869	0.674355	0.668319	0.654695	0.670641
71	0.756619	0.78118	0.798794	0.748581	0.804106	0.787877	0.75199	0.704742	0.775133	0.756521	0.737517	0.676174	0.77099	0.825556	0.812681	0.758654	0.810684	0.78829	0.743701	0.694114	0.769767	0.763748	0.736938	0.67368	0.773333	0.808542	0.802005	0.747849	0.782968	0.762391	0.727608	0.684905	0.756143	0.747963	0.72332	0.669811	0.681977	0.685188	0.679905	0.67565	0.673709	0.674837	0.675929	0.665341	0.688298	0.673777	0.665681	0.655444	0.670843
72	0.763747	0.779962	0.792948	0.757235	0.803506	0.788762	0.752551	0.700428	0.778207	0.756561	0.734788	0.674086	0.770679	0.822257	0.808376	0.758994	0.810176	0.79037	0.743809	0.695183	0.76999	0.762923	0.735496	0.673549	0.774995	0.809534	0.803999	0.747682	0.781909	0.759761	0.729096	0.685112	0.755443	0.749364	0.723192	0.669912	0.683719	0.687	0.680488	0.675712	0.675627	0.67485	0.675548	0.664531	0.689189	0.674861	0.666488	0.65412	0.672145
73	0.75617	0.781529	0.800225	0.749674	0.803663	0.786651	0.749037	0.705971	0.77941	0.756702	0.73694	0.677248	0.769406	0.825783	0.812312	0.75731	0.810985	0.788962	0.745751	0.695056	0.77225	0.763836	0.737159	0.673736	0.77589	0.813963	0.80292	0.750344	0.785226	0.761844	0.730358	0.686012	0.756305	0.749208	0.722763	0.669365	0.682198	0.683843	0.679732	0.676348	0.676172	0.673252	0.674217	0.666206	0.688643	0.674606	0.66774	0.654306	0.669763
74	0.764679	0.782812	0.798059	0.756025	0.804295	0.789299	0.753281	0.703442	0.779558	0.758474	0.733839	0.677705	0.773465	0.823728	0.810489	0.75676	0.813065	0.791187	0.748408	0.695617	0.770399	0.762432	0.735363	0.673894	0.77606	0.809604	0.805284	0.748481	0.783825	0.759396	0.731402	0.688448	0.75802	0.750599	0.723576	0.669068	0.680963	0.681674	0.678455	0.674641	0.675235	0.675297	0.674783	0.668672	0.690391	0.674312	0.668076	0.655888	0.668964
75	0.757877	0.782835	0.799841	0.753419	0.804582	0.789393	0.749474	0.703045	0.779819	0.757873	0.737929	0.67682	0.773115	0.827479	0.811313	0.760826	0.814589	0.790381	0.744815	0.695995	0.770269	0.764493	0.736048	0.674005	0.776088	0.812685	0.805999	0.750504	0.785406	0.761984	0.731826	0.687035	0.761003	0.750249	0.726367	0.669751	0.684892	0.683061	0.679324	0.676942	0.674773	0.673075	0.67355	0.668154	0.692128	0.674711	0.666961	0.656624	0.670923
76	0.762637	0.783359	0.800599	0.755316	0.806338	0.78933	0.750544	0.705215	0.778041	0.757682	0.738576	0.675018	0.77288	0.826487	0.814934	0.760864	0.815011	0.793257	0.743587	0.69581	0.775219	0.764597	0.738257	0.674809	0.777111	0.813448	0.805565	0.750989	0.785298	0.762892	0.729323	0.68761	0.761716	0.750771	0.727399	0.669842	0.684236	0.68363	0.680282	0.677166	0.67538	0.671727	0.67399	0.668228	0.690311	0.675199	0.66743	0.657512	0.67207
77	0.757799	0.781145	0.801538	0.753871	0.805307	0.791157	0.753662	0.703564	0.781723	0.757956	0.738174	0.679046	0.772253	0.832752	0.814325	0.762127	0.814796	0.791128	0.746336	0.696989	0.771871	0.765941	0.739241	0.674024	0.776568	0.81469	0.807202	0.750208	0.784123	0.762908	0.731727	0.68792	0.762136	0.753137	0.725469	0.669799	0.683692	0.679587	0.679494	0.678187	0.674468	0.674191	0.674224	0.665844	0.687802	0.674209	0.66923	0.655226	0.669647
78	0.764972	0.784053	0.800603	0.755889	0.809208	0.791074	0.751173	0.706955	0.779752	0.758106	0.738196	0.676089	0.772553	0.829656	0.814866	0.760863	0.815399	0.794093	0.747628	0.693062	0.772138	0.766141	0.737373	0.674641	0.776259	0.816415	0.806432	0.75218	0.786311	0.763071	0.730175	0.687028	0.761969	0.753678	0.72532	0.670024	0.682895	0.681516	0.680277	0.677395	0.674299	0.675962	0.673767	0.666347	0.689488	0.673042	0.670341	0.654036	0.670072
79	0.760189	0.784859	0.802469	0.751062	0.805643	0.790392	0.750875	0.705702	0.781761	0.758375	0.738243	0.67706	0.77163	0.830225	0.815454	0.762051	0.815107	0.79384	0.745804	0.696975	0.774559	0.765644	0.736802	0.675504	0.7788	0.816806	0.806801	0.75111	0.787449	0.764882	0.732553	0.686903	0.76253	0.753931	0.724277	0.670768	0.684092	0.683127	0.679875	0.675723	0.674533	0.674076	0.674321	0.666125	0.691563	0.674128	0.670677	0.654203	0.67081
80	0.761013	0.782439	0.801968	0.752462	0.81327	0.794891	0.753522	0.703838	0.779422	0.76069	0.736781	0.678348	0.774083	0.8282	0.817196	0.762077	0.818512	0.796446	0.743767	0.697326	0.772689	0.767335	0.739528	0.674639	0.778582	0.816025	0.807851	0.752826	0.787686	0.762769	0.73239	0.686671	0.764135	0.754683	0.723891	0.671118	0.684431	0.681891	0.68224	0.67673	0.675	0.676173	0.674536	0.667993	0.691358	0.674904	0.668115	0.656542	0.670375
81	0.75917	0.783395	0.802501	0.755889	0.809569	0.793446	0.748426	0.703593	0.783713	0.760182	0.736008	0.676684	0.769778	0.832365	0.818947	0.761888	0.818558	0.796188	0.745739	0.695437	0.776016	0.765547	0.739778	0.67439	0.780175	0.818012	0.808426	0.752877	0.790947	0.76427	0.736197	0.684923	0.765806	0.755286	0.725357	0.670544	0.684078	0.680455	0.681022	0.678491	0.675472	0.674303	0.673015	0.664751	0.689958	0.674976	0.668721	0.655884	0.668132
82	0.759082	0.783609	0.801015	0.755094	0.807645	0.79316	0.753986	0.708825	0.780823	0.758456	0.739719	0.676212	0.773634	0.830604	0.81867	0.762489	0.820582	0.794568	0.746476	0.697365	0.775536	0.767707	0.740608	0.673822	0.779688	0.819331	0.810756	0.750819	0.79037	0.763143	0.733939	0.688894	0.766265	0.754285	0.726526	0.671386	0.68552	0.680524	0.680055	0.679212	0.673668	0.67487	0.674213	0.664611	0.692859	0.67469	0.669345	0.655481	0.667575
83	0.760598	0.787437	0.802878	0.757007	0.810404	0.795277	0.752808	0.704126	0.782194	0.759071	0.738311	0.67803	0.770697	0.830163	0.820937	0.764392	0.819427	0.797492	0.749727	0.695492	0.774643	0.767737	0.737492	0.673378	0.779584	0.820151	0.812063	0.752722	0.791661	0.761226	0.734965	0.689402	0.765526	0.755681	0.727004	0.671925	0.682976	0.684768	0.682318	0.678277	0.674231	0.675637	0.674629	0.667617	0.692716	0.675175	0.669906	0.654345	0.669213
84	0.761586	0.786485	0.80431	0.75566	0.808463	0.792955	0.753174	0.70509	0.781374	0.760788	0.738295	0.678022	0.774839	0.830694	0.820727	0.761438	0.820872	0.797351	0.747068	0.699487	0.776214	0.766428	0.740608	0.676037	0.779189	0.821604	0.810871	0.754873	0.787756	0.767775	0.735192	0.690592	0.766355	0.757537	0.727977	0.672087	0.681057	0.683313	0.68371	0.67945	0.676762	0.67789	0.674389	0.666393	0.690566	0.676735	0.670773	0.654259	0.669126
85	0.757267	0.785809	0.805799	0.755466	0.811752	0.794128	0.753988	0.706078	0.781231	0.758064	0.737431	0.678573	0.770812	0.829986	0.821286	0.761757	0.819941	0.796378	0.74825	0.693403	0.778437	0.768469	0.742177	0.675228	0.781411	0.818613	0.809804	0.752773	0.792016	0.763597	0.73653	0.691066	0.766368	0.756352	0.730583	0.673172	0.685486	0.682457	0.681732	0.678651	0.675495	0.67415	0.674124	0.666291	0.690365	0.677436	0.669767	0.654978	0.669752
86	0.761287	0.786573	0.806066	0.755585	0.811249	0.793762	0.751595	0.706614	0.781961	0.762063	0.736486	0.678657	0.773885	0.831664	0.818337	0.762635	0.820977	0.799163	0.747988	0.695387	0.777549	0.768913	0.740656	0.676913	0.782444	0.822431	0.811782	0.753792	0.791064	0.76537	0.735004	0.687646	0.767225	0.756739	0.730303	0.672748	0.68304	0.685788	0.681892	0.678386	0.673556	0.672508	0.675375	0.66573	0.690547	0.675603	0.66886	0.654708	0.668667
87	0.757663	0.78527	0.800699	0.756892	0.809861	0.795846	0.752762	0.704603	0.782614	0.760855	0.737352	0.678009	0.773775	0.832396	0.821786	0.762823	0.821336	0.799097	0.747782	0.697186	0.776933	0.767006	0.739029	0.674516	0.780818	0.823155	0.811465	0.757011	0.791091	0.765644	0.735142	0.688826	0.76767	0.757314	0.728545	0.671842	0.683491	0.687274	0.681241	0.679875	0.674478	0.675337	0.676678	0.664921	0.692672	0.677494	0.671366	0.655583	0.668394
88	0.759966	0.787641	0.80822	0.757777	0.812022	0.794864	0.753456	0.70553	0.783049	0.762514	0.738676	0.679406	0.773045	0.830928	0.821186	0.763374	0.821746	0.800855	0.749041	0.696667	0.780956	0.768987	0.739861	0.675637	0.78237	0.819319	0.812263	0.751652	0.791919	0.762343	0.733611	0.688518	0.768614	0.75869	0.72805	0.670102	0.683293	0.684586	0.682835	0.678622	0.677106	0.677493	0.675484	0.665726	0.69029	0.675484	0.670392	0.657041	0.668421
89	0.759317	0.788485	0.808078	0.754741	0.814047	0.79692	0.760934	0.706092	0.782252	0.760452	0.737894	0.680299	0.772909	0.831958	0.822586	0.761788	0.820697	0.800122	0.747289	0.695502	0.777949	0.769406	0.741784	0.674904	0.784822	0.822246	0.815412	0.756035	0.794285	0.769709	0.73835	0.688726	0.769799	0.758578	0.72796	0.670083	0.683933	0.686001	0.683368	0.679787	0.677164	0.675101	0.676023	0.667257	0.688776	0.674096	0.66987	0.655075	0.67002
90	0.760916	0.786352	0.803836	0.756938	0.812185	0.796183	0.755241	0.704948	0.785308	0.760852	0.7395	0.681504	0.772434	0.83241	0.82466	0.764462	0.822557	0.799371	0.751091	0.696077	0.78051	0.770253	0.743091	0.675841	0.785127	0.822997	0.815272	0.754676	0.794398	0.768507	0.735841	0.689071	0.769608	0.75982	0.728233	0.670741	0.683515	0.685636	0.684068	0.680199	0.677529	0.675874	0.67337	0.667315	0.691449	0.674644	0.672548	0.655935	0.670943
91	0.760214	0.78862	0.805747	0.758719	0.812475	0.801683	0.751814	0.706884	0.783972	0.760774	0.738728	0.679319	0.774822	0.830871	0.824342	0.766203	0.824004	0.798215	0.748298	0.698598	0.780183	0.767397	0.740041	0.675797	0.783785	0.823186	0.818769	0.755858	0.795412	0.77038	0.737685	0.689515	0.769411	0.760544	0.730822	0.671552	0.684313	0.684026	0.68406	0.678886	0.678445	0.67596	0.674802	0.666481	0.690827	0.676591	0.670697	0.654269	0.670284
92	0.761287	0.78752	0.809284	0.755998	0.81389	0.793359	0.753995	0.707382	0.787225	0.762614	0.736214	0.678206	0.771669	0.83519	0.82133	0.76517	0.824022	0.80265	0.747827	0.696002	0.782514	0.770708	0.741049	0.675079	0.786051	0.824531	0.816359	0.758871	0.79434	0.767457	0.736475	0.692707	0.76984	0.760268	0.73203	0.672434	0.684351	0.685292	0.687026	0.679049	0.678145	0.676826	0.67553	0.665811	0.692878	0.677797	0.671106	0.654593	0.669922
93	0.759712	0.789271	0.807832	0.756613	0.814717	0.797537	0.754803	0.705927	0.784893	0.761212	0.738623	0.679223	0.775115	0.832784	0.826987	0.763233	0.82308	0.80118	0.748797	0.697635	0.780646	0.770005	0.740556	0.677075	0.785053	0.824908	0.81566	0.759372	0.795324	0.76999	0.736952	0.692073	0.771541	0.759607	0.730645	0.672499	0.684443	0.68721	0.685059	0.678463	0.674266	0.677946	0.672126	0.667028	0.694223	0.675697	0.67144	0.654261	0.670591
94	0.760333	0.789634	0.807071	0.756717	0.815773	0.798372	0.757753	0.704451	0.787368	0.762923	0.739215	0.682869	0.773108	0.83477	0.823143	0.767053	0.825631	0.800954	0.751104	0.696452	0.781581	0.772257	0.744101	0.675991	0.785137	0.822621	0.817289	0.758151	0.79666	0.769424	0.738506	0.691768	0.772032	0.760689	0.731428	0.672629	0.682354	0.688345	0.68392	0.680992	0.676624	0.67653	0.672483	0.664404	0.692311	0.677129	0.670842	0.654194	0.669605
95	0.760472	0.788708	0.80663	0.756651	0.815788	0.802208	0.759374	0.705315	0.787985	0.761554	0.738228	0.678097	0.776983	0.829672	0.824723	0.766572	0.823958	0.798389	0.74863	0.697031	0.783187	0.769738	0.742537	0.674228	0.785276	0.823727	0.818222	0.757365	0.795262	0.770372	0.738823	0.692263	0.772007	0.761148	0.731353	0.672052	0.683861	0.689176	0.682854	0.680364	0.678136	0.679482	0.673281	0.664174	0.692461	0.678383	0.670711	0.65513	0.672662
96	0.760671	0.792724	0.810901	0.759553	0.814307	0.795556	0.753377	0.708894	0.788093	0.762561	0.735597	0.679422	0.773935	0.833939	0.823566	0.764225	0.82519	0.804618	0.749292	0.698269	0.784522	0.771866	0.742463	0.675165	0.786047	0.82809	0.818434	0.756366	0.798738	0.769604	0.739718	0.689291	0.772376	0.762329	0.730273	0.672567	0.683961	0.688019	0.682233	0.677918	0.674205	0.678232	0.673141	0.665875	0.693695	0.676843	0.671146	0.655231	0.672145
97	0.761423	0.786944	0.81017	0.759485	0.810417	0.801499	0.758568	0.703646	0.787159	0.766259	0.740438	0.680521	0.774683	0.832868	0.824586	0.76548	0.825895	0.806234	0.752765	0.700218	0.7822	0.770664	0.742504	0.675914	0.784904	0.828528	0.818026	0.756098	0.798835	0.772703	0.741429	0.692104	0.775174	0.761768	0.732559	0.674027	0.681462	0.68564	0.685348	0.67873	0.676949	0.680258	0.672042	0.665655	0.696472	0.675613	0.672496	0.653363	0.669887
98	0.762924	0.792606	0.809697	0.758059	0.814942	0.801132	0.757541	0.70295	0.787612	0.762002	0.737023	0.681257	0.775393	0.83449	0.826409	0.769847	0.824792	0.803087	0.752735	0.699811	0.783761	0.770498	0.742202	0.677483	0.786628	0.828659	0.818894	0.758778	0.798116	0.771242	0.740173	0.688913	0.775288	0.76022	0.734672	0.67412	0.684266	0.687339	0.686646	0.681785	0.674706	0.678678	0.673595	0.664972	0.694673	0.676306	0.672936	0.654583	0.670966
99	0.760371	0.790139	0.809955	0.759241	0.816138	0.797784	0.758074	0.708556	0.785213	0.765158	0.738596	0.678756	0.7772	0.835228	0.824597	0.769545	0.825819	0.80423	0.749559	0.696378	0.785787	0.773043	0.744034	0.676246	0.785355	0.828659	0.821407	0.761176	0.797048	0.772285	0.742149	0.693305	0.776113	0.762241	0.733133	0.672832	0.685382	0.690367	0.683477	0.679023	0.674091	0.67717	0.673567	0.66454	0.695024	0.679035	0.672992	0.653467	0.671201
100	0.763991	0.793252	0.809394	0.760643	0.815119	0.799851	0.757493	0.705841	0.785214	0.764041	0.740692	0.68005	0.776203	0.83458	0.825988	0.769218	0.824619	0.805005	0.751135	0.69809	0.785007	0.770774	0.74223	0.67691	0.788778	0.827016	0.821918	0.755299	0.798942	0.772118	0.74219	0.689918	0.775929	0.764399	0.732093	0.672008	0.683461	0.690957	0.685888	0.678165	0.677968	0.679911	0.673729	0.663981	0.695655	0.679009	0.673393	0.655352	0.670501
101	0.758955	0.790984	0.811184	0.758385	0.818229	0.799988	0.757272	0.709345	0.788439	0.761686	0.738802	0.681997	0.776863	0.836167	0.829848	0.767923	0.826857	0.803997	0.750523	0.697969	0.785886	0.772382	0.74376	0.675586	0.787512	0.8292	0.820841	0.760716	0.800956	0.774651	0.741674	0.694651	0.776842	0.76569	0.73162	0.671752	0.684335	0.686654	0.686521	0.677816	0.678761	0.677663	0.672186	0.663184	0.693605	0.677115	0.67189	0.654606	0.67016
102	0.762204	0.79163	0.81234	0.755604	0.816446	0.801484	0.757099	0.706257	0.786161	0.763451	0.739116	0.680099	0.776586	0.839394	0.828693	0.767158	0.825286	0.80558	0.750493	0.69933	0.786467	0.772264	0.743071	0.676641	0.786781	0.829928	0.821587	0.760787	0.802895	0.77292	0.74382	0.6944	0.778392	0.764972	0.732134	0.672257	0.685849	0.686484	0.686064	0.676874	0.677942	0.678479	0.671972	0.664497	0.693119	0.677248	0.672446	0.653818	0.671726
103	0.760726	0.791776	0.812411	0.756575	0.819425	0.80325	0.76252	0.706615	0.786606	0.762707	0.73874	0.679922	0.776405	0.838201	0.82946	0.769709	0.827338	0.804481	0.752802	0.698265	0.786472	0.775133	0.744436	0.676465	0.788725	0.828476	0.822014	0.760359	0.801423	0.771922	0.74176	0.694661	0.778698	0.764175	0.733392	0.672581	0.683901	0.687503	0.6866	0.676651	0.676999	0.678277	0.674293	0.664676	0.694281	0.678982	0.671946	0.653218	0.668355
104	0.76198	0.791636	0.812463	0.75967	0.816166	0.803	0.754981	0.707442	0.790612	0.764165	0.743272	0.680897	0.776522	0.83898	0.829333	0.768889	0.827434	0.803699	0.75374	0.697006	0.786999	0.770542	0.743543	0.676761	0.789024	0.832939	0.822512	0.758469	0.802352	0.773425	0.743003	0.694524	0.778918	0.763848	0.734355	0.673232	0.685836	0.689219	0.684406	0.677943	0.675126	0.676596	0.673254	0.665419	0.694269	0.680078	0.67131	0.654057	0.666696
105	0.758603	0.78957	0.812425	0.759201	0.817086	0.80113	0.756542	0.704557	0.788111	0.763933	0.740532	0.679593	0.777495	0.8393	0.829286	0.768794	0.828253	0.805735	0.752382	0.698458	0.786842	0.774053	0.744759	0.67636	0.786693	0.832638	0.825382	0.759719	0.801085	0.775303	0.7412	0.693995	0.778652	0.764142	0.735206	0.673382	0.685089	0.685617	0.685444	0.678985	0.675565	0.676185	0.674176	0.664309	0.69213	0.678268	0.671022	0.653509	0.667489
106	0.762004	0.792192	0.813143	0.764274	0.816598	0.801027	0.756887	0.707073	0.786949	0.764755	0.738206	0.681864	0.778385	0.838253	0.83224	0.771176	0.828871	0.806391	0.753733	0.698653	0.790863	0.773933	0.744831	0.675168	0.78793	0.83189	0.824163	0.758422	0.803415	0.77339	0.741998	0.693739	0.780503	0.764814	0.733983	0.6729	0.686813	0.688365	0.686522	0.679402	0.676423	0.676753	0.673972	0.66703	0.692865	0.677292	0.669697	0.65552	0.668048
107	0.761163	0.789014	0.817255	0.762091	0.818108	0.799992	0.758327	0.7071	0.786946	0.765022	0.739196	0.681005	0.778793	0.83866	0.828971	0.771353	0.829165	0.806377	0.754714	0.698813	0.786485	0.772524	0.744397	0.676797	0.787365	0.832942	0.825215	0.761011	0.804495	0.775858	0.744516	0.693571	0.781498	0.765349	0.733036	0.672923	0.687402	0.686304	0.687146	0.681433	0.676129	0.677356	0.67418	0.666482	0.693886	0.679502	0.67108	0.656069	0.669189
108	0.76245	0.791161	0.814032	0.760081	0.816383	0.804932	0.758442	0.706945	0.789478	0.765966	0.739553	0.680955	0.777953	0.839372	0.831719	0.770385	0.827698	0.805728	0.75283	0.698917	0.786327	0.775013	0.744529	0.67715	0.789014	0.831827	0.826908	0.760404	0.803959	0.773946	0.74137	0.692754	0.781581	0.765467	0.734519	0.673444	0.683756	0.688246	0.687281	0.679276	0.677474	0.67909	0.673045	0.665857	0.695833	0.68046	0.672642	0.653759	0.670125
109	0.762205	0.792875	0.817681	0.760463	0.820371	0.804883	0.760034	0.704839	0.788022	0.766324	0.738849	0.684633	0.778229	0.840768	0.834251	0.768969	0.829433	0.808592	0.752098	0.700743	0.791395	0.774923	0.744375	0.676767	0.790079	0.831374	0.825385	0.763677	0.805331	0.775034	0.744858	0.690906	0.781083	0.766457	0.735356	0.673945	0.68666	0.686902	0.686432	0.682269	0.677398	0.677854	0.67376	0.665989	0.69629	0.679313	0.675182	0.653527	0.670989
110	0.7631	0.793334	0.816126	0.763454	0.819145	0.803664	0.758542	0.710284	0.790931	0.763876	0.739595	0.68137	0.778313	0.839503	0.833324	0.769571	0.829075	0.80956	0.754643	0.69964	0.789628	0.775327	0.743424	0.677602	0.788482	0.832314	0.823782	0.764258	0.805469	0.776137	0.744847	0.691293	0.780373	0.765948	0.735989	0.674745	0.684542	0.684511	0.68636	0.680695	0.675861	0.679125	0.673279	0.665588	0.69493	0.679469	0.67485	0.654676	0.669832
111	0.761611	0.788742	0.816242	0.760083	0.820358	0.803769	0.759915	0.708851	0.789344	0.766209	0.740068	0.680181	0.778721	0.843849	0.834487	0.770877	0.829139	0.808686	0.752583	0.696807	0.788722	0.773048	0.747072	0.676913	0.791227	0.832877	0.825896	0.764007	0.805522	0.77632	0.744365	0.692966	0.780903	0.766096	0.735831	0.674296	0.686198	0.685095	0.689246	0.678142	0.676329	0.677327	0.673045	0.666425	0.694505	0.679179	0.673326	0.6558	0.670484
112	0.762873	0.793907	0.812463	0.762316	0.818005	0.805149	0.75591	0.706915	0.790451	0.765182	0.743144	0.680407	0.779223	0.841892	0.833916	0.772907	0.830056	0.806837	0.751762	0.699835	0.791742	0.776185	0.74513	0.678742	0.791802	0.834517	0.825451	0.762165	0.805698	0.77807	0.74543	0.693734	0.783125	0.766281	0.734847	0.673018	0.686907	0.684373	0.687368	0.677805	0.675158	0.677122	0.67542	0.665372	0.693569	0.680147	0.671072	0.654436	0.670254
113	0.761144	0.790882	0.812977	0.76237	0.820612	0.804201	0.763122	0.70987	0.789295	0.765768	0.740591	0.681323	0.777886	0.84497	0.836746	0.771306	0.834155	0.812192	0.752515	0.699669	0.791036	0.774717	0.745085	0.678528	0.789211	0.835207	0.829871	0.763519	0.806948	0.777069	0.744396	0.692249	0.783207	0.765596	0.733791	0.672295	0.684821	0.686452	0.687113	0.679276	0.676565	0.677275	0.672382	0.664458	0.694895	0.68128	0.667879	0.654648	0.671076
114	0.759437	0.793467	0.814608	0.763329	0.821065	0.802692	0.758713	0.710394	0.789936	0.765374	0.74115	0.682056	0.779668	0.842271	0.835663	0.772463	0.831438	0.80851	0.7558	0.699007	0.79191	0.774861	0.745699	0.677327	0.791559	0.836802	0.82716	0.763173	0.80517	0.778496	0.74415	0.695631	0.784961	0.767445	0.73405	0.672741	0.684883	0.689127	0.688097	0.6776	0.675665	0.676228	0.675736	0.664344	0.695758	0.679868	0.672459	0.656727	0.670589
115	0.761317	0.791947	0.816744	0.765437	0.822819	0.806604	0.759391	0.70724	0.79192	0.765354	0.741691	0.680908	0.778818	0.844185	0.837902	0.774012	0.831424	0.807516	0.755527	0.701536	0.791264	0.773522	0.74557	0.678093	0.79103	0.835149	0.82877	0.764902	0.808248	0.775409	0.748528	0.694539	0.783139	0.768441	0.73753	0.67338	0.686495	0.686216	0.684921	0.678805	0.678233	0.678173	0.675178	0.66607	0.691547	0.679988	0.673932	0.656681	0.669873
116	0.761297	0.79532	0.814299	0.760173	0.820586	0.805812	0.760663	0.70779	0.791714	0.766344	0.740573	0.681379	0.778925	0.844455	0.836827	0.773367	0.830856	0.807447	0.75508	0.700697	0.792274	0.775449	0.743848	0.678046	0.790573	0.835424	0.829662	0.764448	0.807164	0.775722	0.747467	0.695137	0.78433	0.769181	0.738459	0.673056	0.686426	0.686895	0.684792	0.677518	0.677527	0.678696	0.673913	0.664605	0.694905	0.680999	0.670587	0.656204	0.670273
117	0.759933	0.794098	0.816826	0.76214	0.821844	0.802513	0.760363	0.707147	0.79047	0.764701	0.741033	0.682463	0.779278	0.845242	0.839923	0.774663	0.832379	0.809135	0.754177	0.699427	0.792378	0.776062	0.745666	0.677788	0.792833	0.838426	0.828207	0.762256	0.807237	0.778597	0.747806	0.69433	0.784109	0.76933	0.737824	0.672896	0.68592	0.687671	0.688561	0.677205	0.679806	0.67962	0.673314	0.665197	0.694991	0.680845	0.672907	0.657339	0.671356
118	0.759017	0.797288	0.81687	0.764241	0.819575	0.805112	0.760359	0.710068	0.790458	0.767692	0.742048	0.682613	0.780416	0.841856	0.838319	0.77674	0.832665	0.809585	0.754564	0.700386	0.79313	0.775884	0.745412	0.677412	0.791516	0.835488	0.827562	0.764685	0.808997	0.777871	0.745304	0.694729	0.785963	0.768465	0.736467	0.673868	0.68398	0.688011	0.68815	0.678629	0.682533	0.67815	0.670465	0.665694	0.692152	0.68127	0.673567	0.657929	0.66908
119	0.762857	0.796793	0.816258	0.763638	0.8229	0.806631	0.759658	0.711227	0.791959	0.766532	0.740202	0.682477	0.778425	0.84453	0.839274	0.775508	0.830716	0.809909	0.752477	0.700403	0.794233	0.775028	0.745228	0.677524	0.78887	0.837885	0.831054	0.762182	0.809765	0.779994	0.747012	0.695376	0.785594	0.768267	0.735026	0.674205	0.686396	0.689287	0.685247	0.678714	0.682009	0.677306	0.66968	0.664195	0.693951	0.681247	0.672203	0.654229	0.668873
120	0.759459	0.798548	0.817268	0.765037	0.821035	0.804468	0.758254	0.708452	0.793527	0.766337	0.741206	0.682574	0.779154	0.845796	0.837304	0.773057	0.830031	0.810698	0.756802	0.699503	0.792701	0.776094	0.747905	0.679167	0.792132	0.840227	0.830777	0.764817	0.809355	0.776018	0.748185	0.69563	0.787263	0.768331	0.736567	0.67489	0.68452	0.689759	0.687183	0.677533	0.679673	0.678579	0.6736	0.666327	0.69492	0.680505	0.671914	0.656031	0.670028
121	0.761227	0.796394	0.816139	0.763506	0.822957	0.805469	0.759855	0.705121	0.791547	0.767491	0.741578	0.685383	0.778678	0.848662	0.838296	0.773559	0.831611	0.809586	0.757198	0.70105	0.794533	0.776416	0.744612	0.678951	0.790657	0.83811	0.831761	0.765718	0.808476	0.78159	0.749984	0.695916	0.787912	0.76932	0.738569	0.674793	0.68538	0.687545	0.688895	0.6765	0.679149	0.677695	0.67457	0.666762	0.696913	0.680575	0.672529	0.655816	0.671098
122	0.759832	0.796781	0.81855	0.762801	0.819525	0.805973	0.760386	0.706751	0.793774	0.765839	0.742105	0.683111	0.78113	0.845996	0.838871	0.774562	0.833854	0.81017	0.75314	0.70007	0.796187	0.777393	0.746531	0.678716	0.791333	0.839756	0.829177	0.768268	0.81014	0.778695	0.749907	0.694828	0.786524	0.769356	0.737909	0.674092	0.686367	0.686524	0.68821	0.677938	0.680045	0.681951	0.672946	0.665234	0.695242	0.678464	0.674797	0.657211	0.670519
123	0.761723	0.795895	0.818111	0.764189	0.821854	0.809464	0.76015	0.709808	0.791848	0.767721	0.742224	0.679595	0.780569	0.849175	0.841205	0.772313	0.833789	0.810916	0.756828	0.700314	0.794731	0.775635	0.745143	0.678086	0.791028	0.8421	0.83133	0.764802	0.811285	0.782053	0.747421	0.694694	0.786538	0.77072	0.73845	0.673949	0.685886	0.687319	0.687419	0.678326	0.678252	0.678239	0.672733	0.666408	0.69774	0.679253	0.674258	0.657666	0.671404
124	0.758987	0.799088	0.821046	0.761544	0.819407	0.80838	0.761395	0.707941	0.79303	0.765959	0.742413	0.68139	0.780876	0.843929	0.842193	0.774662	0.831896	0.811361	0.754366	0.704535	0.795222	0.775501	0.746971	0.679277	0.791717	0.841998	0.830932	0.766806	0.811036	0.779604	0.750889	0.697387	0.786266	0.771665	0.737806	0.674176	0.685567	0.689542	0.688079	0.676773	0.676916	0.676811	0.676696	0.66583	0.694977	0.679982	0.673892	0.655104	0.670432
125	0.761382	0.796131	0.818864	0.76375	0.818738	0.805873	0.759078	0.71037	0.793387	0.764841	0.74213	0.682175	0.779718	0.849579	0.84242	0.776554	0.834495	0.812066	0.755569	0.703228	0.795889	0.778223	0.743604	0.676863	0.791842	0.842356	0.828338	0.769156	0.812033	0.778561	0.751059	0.696033	0.788825	0.771413	0.737425	0.674238	0.685528	0.690001	0.688657	0.678639	0.679186	0.680776	0.673296	0.664306	0.694263	0.680828	0.6739	0.655042	0.670199
126	0.761978	0.798285	0.819508	0.763175	0.821399	0.806693	0.761826	0.707826	0.792875	0.768055	0.744425	0.68207	0.779609	0.843653	0.840549	0.773659	0.834026	0.812327	0.756013	0.701588	0.79515	0.779587	0.746823	0.680068	0.792345	0.843509	0.832401	0.765323	0.811437	0.782193	0.750198	0.696783	0.788353	0.771803	0.737257	0.674747	0.685153	0.690416	0.686711	0.67974	0.680252	0.678607	0.672499	0.667712	0.695107	0.681358	0.674374	0.656153	0.671857
127	0.761038	0.795122	0.820511	0.763637	0.822186	0.81318	0.759452	0.706857	0.794551	0.768334	0.741893	0.685864	0.779647	0.849212	0.841612	0.774314	0.834134	0.815141	0.756601	0.70054	0.797768	0.776044	0.747612	0.679544	0.792773	0.843023	0.831845	0.766569	0.816042	0.779489	0.751514	0.69641	0.788825	0.773301	0.737906	0.675581	0.686288	0.688393	0.685313	0.678134	0.679115	0.679846	0.67067	0.664812	0.694824	0.679887	0.675985	0.654969	0.671144
128	0.761261	0.798315	0.82028	0.765334	0.822635	0.806595	0.760978	0.705957	0.791474	0.768438	0.744022	0.68118	0.778494	0.843923	0.841997	0.774509	0.833162	0.812498	0.753837	0.702424	0.797666	0.778206	0.745355	0.679231	0.792497	0.844138	0.831931	0.76729	0.814754	0.78222	0.747149	0.695881	0.788944	0.772726	0.73846	0.674391	0.687805	0.687607	0.685079	0.679307	0.679189	0.679727	0.672975	0.66479	0.693337	0.678572	0.67649	0.655389	0.671791
129	0.761164	0.801426	0.819222	0.763434	0.821304	0.808526	0.75946	0.711524	0.795628	0.767996	0.74397	0.682573	0.779059	0.848126	0.841715	0.773738	0.835359	0.813869	0.755828	0.702044	0.796662	0.778652	0.746648	0.678426	0.7917	0.842815	0.835491	0.766989	0.814341	0.782361	0.751102	0.696417	0.787678	0.77282	0.738223	0.674838	0.688931	0.687642	0.684193	0.677626	0.680405	0.677842	0.672436	0.665111	0.692736	0.681935	0.67556	0.656243	0.672449
130	0.761086	0.797686	0.818974	0.766018	0.824041	0.810622	0.762769	0.708281	0.793871	0.768416	0.741799	0.684729	0.780946	0.845687	0.841691	0.775743	0.836271	0.814204	0.758088	0.703375	0.797032	0.778403	0.746074	0.67973	0.791583	0.844537	0.834006	0.765164	0.813402	0.781161	0.749974	0.695667	0.787949	0.774246	0.737914	0.675654	0.688852	0.685031	0.685329	0.679121	0.67692	0.67878	0.672856	0.666514	0.694183	0.67994	0.675489	0.655194	0.671225
131	0.761881	0.80024	0.824804	0.765308	0.821503	0.808258	0.759627	0.709709	0.794637	0.768421	0.742579	0.679337	0.778786	0.846505	0.84028	0.77636	0.834596	0.812572	0.755939	0.704461	0.798054	0.778868	0.749365	0.67951	0.791348	0.844378	0.83188	0.765526	0.815307	0.783119	0.751417	0.697786	0.788717	0.773897	0.738318	0.675124	0.690961	0.683669	0.683332	0.677637	0.67534	0.67777	0.673393	0.668279	0.694762	0.680448	0.674416	0.654077	0.670126
132	0.762854	0.798999	0.818502	0.764221	0.822828	0.809939	0.762343	0.707659	0.796592	0.767641	0.744879	0.684264	0.782512	0.847126	0.843329	0.774713	0.83654	0.811134	0.758676	0.700086	0.800487	0.781202	0.743636	0.677933	0.792939	0.843532	0.831849	0.767067	0.815768	0.784397	0.751365	0.697086	0.791443	0.774652	0.739064	0.67426	0.689996	0.68778	0.684301	0.678746	0.678697	0.680293	0.672298	0.667722	0.694918	0.681873	0.67349	0.654867	0.671731
133	0.761354	0.796975	0.822516	0.7662	0.822281	0.808525	0.760038	0.705173	0.793232	0.770497	0.743444	0.682837	0.780431	0.847814	0.84226	0.776999	0.837747	0.813743	0.755788	0.702652	0.797717	0.776687	0.746744	0.679012	0.792386	0.844212	0.833437	0.768177	0.814953	0.782572	0.750844	0.698786	0.79029	0.774464	0.740573	0.674389	0.690149	0.686755	0.683098	0.678427	0.679764	0.679284	0.671847	0.668054	0.694405	0.684269	0.675713	0.657605	0.671516
134	0.760089	0.796739	0.818696	0.766723	0.822747	0.811204	0.762864	0.711138	0.796633	0.769134	0.742989	0.682169	0.782556	0.844942	0.844218	0.774628	0.836086	0.812231	0.755982	0.703856	0.799731	0.780823	0.749681	0.679882	0.790735	0.843752	0.833351	0.767167	0.814625	0.785182	0.753669	0.69655	0.790423	0.772718	0.739945	0.673517	0.690538	0.687789	0.688072	0.675497	0.679307	0.679032	0.672651	0.667193	0.694853	0.684123	0.6753	0.657693	0.671048
135	0.762499	0.79858	0.82375	0.763668	0.824179	0.81002	0.761721	0.711064	0.793874	0.767599	0.743353	0.683028	0.780373	0.848742	0.845923	0.777064	0.836779	0.811544	0.757946	0.705219	0.800194	0.77966	0.746117	0.679344	0.792798	0.84448	0.833934	0.76689	0.816725	0.78215	0.752218	0.700879	0.793043	0.773781	0.737872	0.6744	0.689464	0.688267	0.686345	0.67811	0.681008	0.680044	0.672648	0.667485	0.697103	0.681923	0.673453	0.656068	0.670015
136	0.762249	0.801035	0.82274	0.770938	0.824796	0.806788	0.764566	0.70762	0.797003	0.767748	0.745152	0.68306	0.782136	0.846453	0.843335	0.776191	0.835131	0.811578	0.757752	0.702659	0.799177	0.778793	0.747347	0.679141	0.792562	0.847882	0.833336	0.765516	0.816948	0.782736	0.752415	0.698015	0.794255	0.774305	0.739098	0.675744	0.688261	0.687591	0.687756	0.677234	0.679976	0.678969	0.672892	0.665854	0.696198	0.680689	0.673689	0.655065	0.670776
137	0.76016	0.795071	0.820888	0.7667	0.82568	0.808213	0.764832	0.710668	0.794236	0.769025	0.742981	0.683965	0.782599	0.847512	0.843303	0.77668	0.836881	0.815431	0.759827	0.701479	0.801554	0.780484	0.746904	0.679417	0.793177	0.846736	0.834493	0.766358	0.817738	0.786737	0.752191	0.698656	0.7916	0.774618	0.740482	0.676198	0.690701	0.688132	0.687104	0.679631	0.677587	0.677315	0.673758	0.667381	0.694888	0.682151	0.673683	0.655777	0.672595
138	0.7603	0.79872	0.818197	0.761833	0.826714	0.81185	0.763269	0.70971	0.795387	0.769019	0.744377	0.683006	0.779318	0.847947	0.844358	0.777501	0.836096	0.81555	0.757461	0.704988	0.800492	0.778725	0.748542	0.679437	0.793611	0.846615	0.8359	0.764661	0.815837	0.784153	0.753881	0.697673	0.790761	0.775189	0.738929	0.676355	0.687017	0.685176	0.689093	0.680479	0.677615	0.677267	0.674473	0.667473	0.697339	0.680731	0.674118	0.656177	0.672345
139	0.764924	0.80007	0.824637	0.766645	0.827735	0.806928	0.764586	0.707704	0.796024	0.767871	0.743171	0.684693	0.783347	0.850131	0.84449	0.777063	0.836368	0.814865	0.760204	0.705718	0.798623	0.780967	0.746359	0.680191	0.791884	0.84695	0.838008	0.764987	0.821389	0.783992	0.752296	0.696183	0.792062	0.773647	0.738611	0.677376	0.68838	0.688363	0.687075	0.679986	0.678024	0.67591	0.67104	0.668344	0.697249	0.681422	0.675458	0.655568	0.674123
140	0.76122	0.800942	0.816085	0.766352	0.826906	0.808257	0.762246	0.711879	0.795789	0.771221	0.743216	0.684466	0.781104	0.848383	0.843485	0.779439	0.833852	0.813308	0.756438	0.703048	0.802864	0.777783	0.748883	0.679561	0.792691	0.846629	0.838146	0.769429	0.818205	0.783369	0.753799	0.700238	0.792178	0.77548	0.739826	0.676283	0.689928	0.686685	0.688396	0.680243	0.681081	0.679244	0.67291	0.667105	0.695918	0.682933	0.676082	0.655482	0.674388
141	0.764039	0.800219	0.82608	0.768095	0.826599	0.810419	0.760281	0.709926	0.794036	0.768828	0.745339	0.681437	0.785015	0.850579	0.845015	0.776943	0.835813	0.815332	0.759316	0.702544	0.802984	0.783474	0.745394	0.67893	0.794871	0.848434	0.834706	0.77051	0.817964	0.783664	0.752066	0.70198	0.794439	0.776148	0.739609	0.676603	0.687254	0.687679	0.688572	0.679531	0.679335	0.679484	0.67439	0.664586	0.696262	0.684857	0.675898	0.654434	0.674135
142	0.761227	0.799687	0.820682	0.769406	0.826323	0.809917	0.763894	0.709257	0.795609	0.770598	0.745078	0.68041	0.782255	0.848935	0.847861	0.778148	0.836831	0.813845	0.761132	0.704307	0.801767	0.779607	0.749376	0.679767	0.793469	0.849344	0.836486	0.766305	0.82161	0.785209	0.754792	0.703873	0.793916	0.776476	0.739294	0.678034	0.686889	0.686468	0.688936	0.679948	0.679874	0.67892	0.675509	0.663603	0.696077	0.68399	0.675992	0.653753	0.674005
143	0.760033	0.798412	0.825606	0.76747	0.825947	0.809691	0.76234	0.709962	0.797182	0.771224	0.745412	0.682115	0.784517	0.854854	0.844126	0.775973	0.837008	0.815897	0.757787	0.704774	0.802365	0.778087	0.746775	0.680141	0.794873	0.846962	0.8379	0.770764	0.820818	0.785362	0.75174	0.697926	0.793532	0.776325	0.739723	0.677212	0.684029	0.686636	0.69007	0.680477	0.680259	0.680147	0.675505	0.668447	0.696304	0.68321	0.675485	0.655431	0.674862
144	0.763501	0.802988	0.826713	0.769385	0.827172	0.810689	0.764626	0.712046	0.794601	0.770925	0.745525	0.682115	0.781249	0.848745	0.847044	0.778089	0.836802	0.815134	0.759559	0.703514	0.804441	0.781452	0.746352	0.681482	0.793824	0.851404	0.834602	0.76806	0.817992	0.785065	0.754999	0.699354	0.794531	0.773986	0.737892	0.675921	0.686676	0.687385	0.688973	0.679306	0.68068	0.681085	0.673758	0.667535	0.697588	0.682522	0.674935	0.657199	0.675147
145	0.761895	0.801561	0.825876	0.766941	0.82724	0.81029	0.761932	0.710433	0.795664	0.772662	0.744302	0.682567	0.782933	0.850894	0.846312	0.779434	0.838166	0.816385	0.760375	0.704878	0.802424	0.781224	0.748483	0.680569	0.794484	0.848957	0.837968	0.768193	0.821398	0.786218	0.753996	0.697746	0.794353	0.77525	0.737254	0.675206	0.682536	0.688347	0.688086	0.680693	0.678685	0.680393	0.67252	0.66553	0.700391	0.682447	0.676519	0.656442	0.674858
146	0.760173	0.800435	0.826281	0.771966	0.826291	0.812892	0.763038	0.70951	0.7958	0.770956	0.745163	0.681505	0.783168	0.848211	0.850343	0.780927	0.837653	0.815255	0.758984	0.705356	0.803994	0.778771	0.748243	0.681148	0.795414	0.847214	0.842338	0.768336	0.820428	0.785603	0.755589	0.697819	0.795663	0.776656	0.737296	0.676396	0.685604	0.686065	0.688118	0.680419	0.681701	0.678706	0.675735	0.66491	0.699337	0.682507	0.674561	0.65466	0.675033
147	0.76492	0.803472	0.820387	0.766504	0.825034	0.814357	0.762243	0.707997	0.799437	0.771913	0.744136	0.685922	0.783272	0.851242	0.848203	0.77886	0.836718	0.816233	0.758984	0.704933	0.80443	0.780577	0.746994	0.679921	0.794837	0.851558	0.838243	0.767352	0.818703	0.785894	0.750236	0.699805	0.794883	0.778601	0.739432	0.677021	0.688178	0.688433	0.688107	0.680832	0.678235	0.676747	0.676789	0.665281	0.698209	0.683311	0.673702	0.654918	0.675369
148	0.763074	0.800055	0.823961	0.768225	0.826902	0.812897	0.762124	0.708476	0.798289	0.771128	0.744751	0.681896	0.784567	0.848389	0.848875	0.778604	0.839593	0.817834	0.758513	0.704676	0.802872	0.782438	0.748363	0.679733	0.794269	0.852276	0.837813	0.767636	0.820727	0.787371	0.753609	0.700215	0.794595	0.779862	0.740971	0.676088	0.687098	0.69015	0.689555	0.679143	0.675951	0.677178	0.673921	0.667747	0.699039	0.682533	0.676689	0.65502	0.675582
149	0.762339	0.799846	0.824533	0.770031	0.828121	0.813879	0.764232	0.711184	0.797359	0.770643	0.744352	0.681803	0.782095	0.850587	0.851319	0.777828	0.836797	0.815134	0.762378	0.704406	0.8043	0.782616	0.747699	0.680666	0.794724	0.851475	0.840359	0.769154	0.819788	0.783997	0.753619	0.700333	0.796017	0.777792	0.740155	0.67677	0.687022	0.687478	0.689257	0.67936	0.678658	0.67917	0.672758	0.668023	0.69794	0.681276	0.675772	0.655086	0.674859
150	0.763434	0.801402	0.824033	0.76856	0.826036	0.812217	0.763138	0.707651	0.796073	0.770115	0.746416	0.683462	0.784456	0.849468	0.849855	0.777064	0.839721	0.815994	0.757421	0.704028	0.806725	0.777869	0.746293	0.679861	0.795712	0.851382	0.8401	0.770683	0.820974	0.788337	0.755145	0.700615	0.795071	0.777121	0.74071	0.677247	0.685315	0.686651	0.689508	0.679993	0.67786	0.679212	0.674555	0.668791	0.696361	0.681955	0.67522	0.653196	0.675771
151	0.761001	0.801849	0.826046	0.77204	0.828589	0.81616	0.763755	0.71235	0.796587	0.769001	0.747335	0.681692	0.782506	0.851691	0.849245	0.775557	0.838131	0.815561	0.761067	0.704994	0.803575	0.781315	0.747943	0.680273	0.794125	0.851435	0.837047	0.767481	0.823792	0.785091	0.758303	0.700307	0.796847	0.775607	0.739724	0.677841	0.687151	0.68685	0.687803	0.678581	0.678703	0.680485	0.674413	0.666284	0.694244	0.68443	0.675627	0.65585	0.674951
152	0.763372	0.800917	0.824842	0.772115	0.825244	0.810114	0.762317	0.713405	0.799825	0.771211	0.745707	0.683315	0.784054	0.851934	0.850047	0.775995	0.837181	0.816311	0.760836	0.702941	0.806295	0.78207	0.749859	0.681745	0.795379	0.851607	0.836694	0.769607	0.821497	0.78707	0.754786	0.699739	0.797718	0.775528	0.740235	0.678795	0.687442	0.687356	0.691229	0.6816	0.680395	0.678536	0.672281	0.667584	0.697533	0.681622	0.675342	0.654099	0.673222
153	0.76276	0.801233	0.827553	0.772444	0.82896	0.813361	0.765883	0.710341	0.797873	0.77192	0.748743	0.682827	0.782069	0.85143	0.849732	0.778487	0.840355	0.815424	0.758475	0.705869	0.806106	0.781048	0.746997	0.67983	0.796138	0.85096	0.840342	0.773383	0.821704	0.782734	0.754734	0.699935	0.797641	0.777482	0.741614	0.679289	0.686805	0.687277	0.690054	0.681758	0.681141	0.680289	0.674167	0.667459	0.696242	0.681095	0.676668	0.655643	0.673122
154	0.760455	0.803451	0.824203	0.770786	0.828423	0.813175	0.762912	0.707936	0.795733	0.772008	0.74619	0.684	0.782641	0.849792	0.851668	0.775535	0.836178	0.816388	0.760594	0.703034	0.806121	0.782006	0.749545	0.679931	0.795494	0.854721	0.840358	0.769256	0.823407	0.787453	0.756965	0.699351	0.797803	0.777832	0.738987	0.679477	0.685045	0.689505	0.691381	0.678874	0.68082	0.679554	0.673402	0.666576	0.696246	0.684411	0.67491	0.656641	0.674894
155	0.762457	0.802247	0.826736	0.77373	0.828059	0.811818	0.763073	0.709803	0.798838	0.773901	0.74332	0.684755	0.782185	0.849644	0.850835	0.776586	0.839691	0.81438	0.761587	0.705426	0.806666	0.780334	0.747934	0.679874	0.796715	0.856363	0.840993	0.767351	0.823953	0.786619	0.753937	0.701235	0.797656	0.77878	0.739884	0.677679	0.688282	0.688045	0.688259	0.679765	0.678949	0.679854	0.674565	0.667852	0.698692	0.686043	0.674774	0.65539	0.675653
156	0.76144	0.804586	0.827531	0.774052	0.829004	0.81382	0.765176	0.708463	0.799814	0.7729	0.746578	0.679678	0.782153	0.846934	0.85054	0.777485	0.838347	0.815708	0.759814	0.704469	0.805357	0.783132	0.750604	0.680569	0.796541	0.854381	0.840012	0.767942	0.82415	0.788069	0.757631	0.701124	0.797328	0.777582	0.741055	0.677681	0.688562	0.688269	0.68683	0.677945	0.67889	0.680264	0.67365	0.668261	0.698471	0.684935	0.674946	0.654562	0.67362
157	0.763416	0.803627	0.825968	0.771056	0.8279	0.816046	0.76383	0.706949	0.798764	0.772135	0.747137	0.683388	0.781976	0.851072	0.85094	0.778699	0.840228	0.817023	0.760619	0.705118	0.808342	0.783392	0.746047	0.680777	0.79491	0.852373	0.840158	0.767696	0.824847	0.788689	0.754071	0.700887	0.796375	0.776521	0.739075	0.678206	0.688925	0.687293	0.687002	0.678839	0.681398	0.677866	0.675544	0.668398	0.699301	0.682888	0.674825	0.655419	0.67182
158	0.762528	0.80206	0.8272	0.771864	0.829104	0.813171	0.767576	0.712714	0.799676	0.771808	0.745045	0.683628	0.781757	0.849232	0.850746	0.779064	0.839322	0.814149	0.762319	0.704939	0.807591	0.781549	0.74756	0.682393	0.796295	0.85508	0.842323	0.76896	0.822626	0.786772	0.753671	0.703883	0.798901	0.777808	0.739362	0.677845	0.687535	0.688071	0.688654	0.681148	0.682666	0.678765	0.674395	0.667221	0.697669	0.684961	0.674794	0.654768	0.672895
159	0.763426	0.806049	0.826648	0.772829	0.828474	0.816453	0.762574	0.709405	0.798316	0.771292	0.747539	0.684686	0.782481	0.85241	0.852175	0.778536	0.841626	0.816674	0.763288	0.70382	0.809332	0.782111	0.74977	0.678751	0.796775	0.855696	0.841943	0.770818	0.824494	0.787072	0.756791	0.700774	0.799239	0.778968	0.740408	0.677405	0.687274	0.689351	0.688708	0.679385	0.680118	0.678557	0.674614	0.666679	0.699554	0.683701	0.674318	0.654386	0.674499
160	0.761352	0.80367	0.829399	0.773917	0.828312	0.814072	0.764101	0.711819	0.801097	0.773555	0.74705	0.681022	0.784706	0.850121	0.852748	0.78256	0.840775	0.8166	0.761597	0.70289	0.807758	0.781914	0.74857	0.681225	0.796895	0.853742	0.842904	0.768512	0.823542	0.787104	0.756253	0.701125	0.79789	0.780699	0.738444	0.678702	0.688546	0.692021	0.687025	0.67687	0.680479	0.677648	0.673626	0.665483	0.699045	0.683673	0.675748	0.655015	0.672675
161	0.763263	0.803648	0.828239	0.769622	0.830457	0.813834	0.7653	0.711103	0.798757	0.77212	0.748181	0.684243	0.781099	0.849915	0.848977	0.778465	0.842129	0.820166	0.762872	0.706951	0.80835	0.783042	0.74757	0.681069	0.794652	0.854687	0.841866	0.767206	0.82461	0.78894	0.756164	0.700227	0.798741	0.780611	0.738812	0.679347	0.686955	0.691188	0.686728	0.677345	0.679402	0.677026	0.673962	0.667076	0.700369	0.686055	0.675866	0.654461	0.672975
162	0.760739	0.804698	0.82962	0.774545	0.828635	0.811404	0.763896	0.708374	0.801028	0.769857	0.746498	0.683997	0.783867	0.851966	0.8534	0.776484	0.839979	0.815799	0.761984	0.705065	0.809214	0.78257	0.749563	0.681455	0.795303	0.857116	0.842248	0.772511	0.824068	0.786525	0.754632	0.699773	0.7983	0.779959	0.739587	0.678732	0.688313	0.68954	0.689489	0.679298	0.679819	0.678341	0.674943	0.666394	0.700613	0.684066	0.676645	0.655886	0.673009
163	0.76222	0.803587	0.82769	0.770214	0.831908	0.81434	0.766244	0.708184	0.800301	0.773179	0.747987	0.684296	0.781258	0.852777	0.851088	0.779058	0.841966	0.817035	0.762967	0.703345	0.808367	0.781253	0.747281	0.680304	0.798406	0.85715	0.842843	0.766568	0.825628	0.78794	0.754513	0.702642	0.800973	0.778807	0.74002	0.678505	0.688838	0.689944	0.689896	0.68144	0.681346	0.677529	0.674283	0.667056	0.700132	0.683803	0.675815	0.652813	0.674326
164	0.764085	0.801033	0.830174	0.772397	0.83117	0.817749	0.766782	0.709608	0.798537	0.770031	0.747313	0.682367	0.781875	0.851713	0.853189	0.778303	0.840942	0.816967	0.761146	0.706499	0.808882	0.782237	0.747763	0.680602	0.79592	0.857882	0.84162	0.769281	0.826486	0.79084	0.756658	0.702138	0.799444	0.779026	0.739963	0.679409	0.691846	0.688496	0.687508	0.680611	0.681691	0.679436	0.674	0.667541	0.69929	0.685255	0.676867	0.654021	0.674249
165	0.761746	0.80687	0.831072	0.772076	0.831051	0.815185	0.764644	0.707641	0.800168	0.773755	0.746384	0.683033	0.782623	0.85345	0.852513	0.778468	0.840073	0.817471	0.763067	0.705961	0.809681	0.783577	0.749405	0.681173	0.798196	0.856161	0.841922	0.771044	0.827638	0.787341	0.757375	0.704859	0.799988	0.778216	0.738987	0.678907	0.69049	0.689367	0.687522	0.681296	0.681139	0.676932	0.674546	0.666618	0.698666	0.685603	0.676316	0.653999	0.674224
166	0.763778	0.806183	0.82822	0.776172	0.831999	0.815812	0.766956	0.712209	0.799229	0.772492	0.744534	0.682572	0.781138	0.852594	0.853844	0.781395	0.839226	0.818096	0.763091	0.706738	0.808963	0.782936	0.749172	0.681421	0.797859	0.856708	0.840764	0.769436	0.82734	0.789906	0.757056	0.701656	0.799447	0.778183	0.737645	0.678419	0.693159	0.693091	0.687641	0.67986	0.682444	0.675816	0.67345	0.667894	0.699294	0.686302	0.677102	0.653613	0.675456
167	0.762863	0.804046	0.830259	0.774945	0.832748	0.817678	0.769311	0.706479	0.800674	0.773709	0.745519	0.683334	0.784017	0.852607	0.851565	0.778915	0.841064	0.817577	0.760941	0.703785	0.81114	0.783089	0.748317	0.681713	0.796439	0.856868	0.844027	0.770328	0.82807	0.790732	0.756342	0.701888	0.800401	0.780596	0.737279	0.677796	0.691344	0.691001	0.688108	0.677761	0.682506	0.676505	0.67512	0.666254	0.698451	0.684715	0.675702	0.653258	0.673687
168	0.76033	0.804562	0.829682	0.776802	0.829926	0.816956	0.76494	0.707964	0.800193	0.771071	0.745158	0.681503	0.781485	0.853559	0.856927	0.778158	0.843305	0.818712	0.762911	0.708076	0.810075	0.782937	0.748826	0.680373	0.799177	0.855129	0.840685	0.771227	0.829112	0.789557	0.756972	0.703866	0.800923	0.781212	0.73874	0.677497	0.688314	0.691645	0.69061	0.67901	0.683909	0.6802	0.674828	0.666648	0.697723	0.685612	0.676115	0.654601	0.674127
169	0.763014	0.804448	0.832905	0.775075	0.834763	0.813384	0.769763	0.710573	0.799813	0.772461	0.746517	0.682458	0.783153	0.852556	0.853896	0.776985	0.841385	0.816589	0.761806	0.704475	0.809476	0.784684	0.748672	0.681979	0.796442	0.856519	0.840512	0.770406	0.830468	0.790539	0.757089	0.704063	0.800552	0.782631	0.738941	0.678524	0.68834	0.691948	0.688264	0.677473	0.682964	0.680654	0.674714	0.667226	0.697153	0.684729	0.677497	0.654516	0.67642
170	0.762851	0.803994	0.829482	0.778025	0.829739	0.814869	0.761361	0.708846	0.799785	0.770708	0.746978	0.682602	0.782974	0.852666	0.855189	0.778188	0.843061	0.817587	0.762527	0.70486	0.812178	0.782459	0.748958	0.681248	0.79745	0.856754	0.844201	0.772138	0.830996	0.788575	0.757988	0.705112	0.802012	0.781615	0.738876	0.679949	0.68693	0.691274	0.690936	0.679497	0.678862	0.679015	0.673075	0.666668	0.700664	0.685936	0.676933	0.65428	0.676045
171	0.760403	0.804394	0.831998	0.774117	0.833578	0.814118	0.766695	0.710346	0.801416	0.772475	0.747932	0.683783	0.782593	0.853067	0.852504	0.779281	0.840858	0.817477	0.764919	0.706849	0.811486	0.784131	0.74946	0.680034	0.797914	0.85716	0.845907	0.768652	0.828479	0.789204	0.758779	0.704248	0.802677	0.781332	0.738337	0.679657	0.690046	0.690854	0.691042	0.679239	0.67792	0.680748	0.671574	0.66744	0.700484	0.687362	0.677821	0.654033	0.674959
172	0.760519	0.809794	0.832069	0.776317	0.830026	0.813866	0.765632	0.712956	0.800122	0.771915	0.745349	0.685638	0.783319	0.854473	0.855346	0.780456	0.841865	0.818024	0.763537	0.704943	0.811881	0.783867	0.747964	0.681285	0.797747	0.85777	0.846531	0.776052	0.831625	0.789459	0.75692	0.703374	0.803887	0.781904	0.738805	0.679101	0.689725	0.691308	0.690424	0.678656	0.679414	0.677469	0.674444	0.666027	0.700087	0.687239	0.677614	0.651337	0.674636
173	0.76447	0.806765	0.830693	0.775945	0.8321	0.816083	0.764705	0.710253	0.801528	0.775237	0.742796	0.683676	0.784398	0.851538	0.854535	0.778603	0.842572	0.817667	0.762682	0.70831	0.809792	0.783354	0.749308	0.679825	0.797938	0.859663	0.841587	0.771274	0.831167	0.791115	0.759575	0.704672	0.802222	0.781576	0.739029	0.678779	0.686723	0.688234	0.691303	0.679187	0.679861	0.67991	0.675364	0.667493	0.698679	0.685833	0.673425	0.653682	0.676207
174	0.763672	0.805617	0.830694	0.773202	0.832534	0.815219	0.766015	0.711996	0.800879	0.770373	0.7457	0.684387	0.784762	0.853329	0.855248	0.7829	0.841441	0.819426	0.761713	0.705439	0.812214	0.782494	0.749718	0.681864	0.799243	0.858709	0.846319	0.772565	0.828837	0.790355	0.758035	0.702483	0.800562	0.78174	0.739435	0.678186	0.687565	0.687852	0.690402	0.68199	0.681069	0.680285	0.678311	0.668276	0.698646	0.686053	0.674126	0.656776	0.675386
175	0.762559	0.803902	0.830047	0.776292	0.832806	0.813453	0.767023	0.710247	0.800441	0.771157	0.74499	0.683797	0.783654	0.853226	0.854534	0.780914	0.84129	0.820248	0.766719	0.705655	0.812252	0.785616	0.749372	0.681931	0.798885	0.856259	0.846954	0.773198	0.832503	0.793671	0.757802	0.702214	0.802167	0.781254	0.737286	0.678074	0.689986	0.691129	0.68827	0.681374	0.680059	0.676393	0.675798	0.665866	0.69868	0.688138	0.67659	0.655497	0.676204
176	0.761888	0.80681	0.828112	0.776299	0.833575	0.815034	0.769593	0.711389	0.800246	0.772213	0.747762	0.681822	0.783491	0.854239	0.854863	0.780963	0.84124	0.819173	0.765512	0.705229	0.812316	0.783543	0.747225	0.680771	0.799846	0.857998	0.844565	0.772966	0.8323	0.78816	0.759788	0.704639	0.80262	0.780156	0.736177	0.678682	0.688445	0.690831	0.685213	0.679839	0.679787	0.677023	0.674488	0.667391	0.699065	0.687135	0.675462	0.653903	0.676276
177	0.763863	0.807728	0.829965	0.78055	0.835718	0.817033	0.765276	0.710579	0.802424	0.773717	0.747015	0.684992	0.783454	0.856445	0.855921	0.780119	0.84072	0.818092	0.763995	0.704411	0.813301	0.7837	0.749987	0.68056	0.79877	0.859555	0.843728	0.775162	0.832813	0.790744	0.760657	0.702566	0.803897	0.781655	0.737895	0.679121	0.690539	0.69232	0.6877	0.68185	0.682261	0.679296	0.672519	0.670294	0.69988	0.686243	0.676361	0.653275	0.676672
178	0.763357	0.804829	0.830574	0.776252	0.832524	0.817127	0.769114	0.712992	0.799596	0.772504	0.744374	0.684758	0.783796	0.854873	0.854385	0.780077	0.842617	0.819471	0.766085	0.706003	0.811485	0.783696	0.747693	0.681598	0.799996	0.860044	0.843738	0.768313	0.831547	0.786764	0.758436	0.706006	0.802723	0.782249	0.740225	0.679014	0.691746	0.691766	0.688179	0.681899	0.682198	0.678743	0.672701	0.667681	0.701171	0.686616	0.675658	0.653154	0.678012
179	0.764083	0.805708	0.834853	0.777131	0.830565	0.816681	0.769469	0.710056	0.802299	0.77191	0.747037	0.683365	0.782403	0.853636	0.856252	0.778852	0.841302	0.818821	0.765941	0.70696	0.813426	0.78592	0.749569	0.682188	0.798438	0.859063	0.845328	0.774159	0.832246	0.789882	0.759741	0.70169	0.8019	0.782651	0.741233	0.679705	0.690292	0.690755	0.688991	0.680666	0.678196	0.679937	0.673191	0.667021	0.698435	0.685473	0.6747	0.654247	0.677603
180	0.762946	0.807053	0.832436	0.780034	0.834806	0.815834	0.766952	0.709946	0.80132	0.775374	0.745999	0.685834	0.785516	0.852819	0.858818	0.780349	0.842675	0.820573	0.76378	0.705996	0.813317	0.784885	0.74883	0.682119	0.799755	0.859679	0.845471	0.770565	0.832926	0.79091	0.757979	0.702017	0.801126	0.784438	0.740162	0.679989	0.689642	0.691515	0.69033	0.681124	0.679381	0.679914	0.676394	0.667366	0.700464	0.686183	0.676308	0.654915	0.677699
181	0.762045	0.807873	0.834711	0.777402	0.835392	0.817761	0.768591	0.710829	0.800165	0.773189	0.748642	0.681514	0.781821	0.854925	0.857235	0.781313	0.843265	0.820828	0.764729	0.7068	0.812023	0.784105	0.749629	0.680293	0.800011	0.862018	0.84726	0.770394	0.833976	0.791147	0.759302	0.702681	0.801643	0.782709	0.739482	0.679573	0.689684	0.692343	0.690774	0.678571	0.677485	0.681708	0.675237	0.668892	0.7008	0.687744	0.674523	0.652247	0.675431
182	0.760815	0.806982	0.829817	0.779379	0.832613	0.817143	0.764429	0.711715	0.804356	0.774545	0.746634	0.683989	0.786098	0.855303	0.855279	0.782056	0.844401	0.821557	0.766969	0.707484	0.81563	0.785001	0.748215	0.680849	0.798025	0.861151	0.847182	0.773542	0.83077	0.791453	0.760756	0.701884	0.802595	0.782747	0.740574	0.679363	0.688912	0.691226	0.688362	0.681662	0.677573	0.680397	0.675033	0.667232	0.699515	0.686028	0.674787	0.653477	0.672971
183	0.762755	0.80367	0.83302	0.776239	0.83316	0.817332	0.768405	0.712746	0.799898	0.775007	0.745884	0.685451	0.783084	0.854712	0.857301	0.780769	0.842475	0.821654	0.764325	0.70927	0.815153	0.784312	0.749606	0.680848	0.799854	0.860333	0.848	0.774461	0.832523	0.788121	0.760901	0.703829	0.803439	0.783189	0.739441	0.678055	0.690571	0.69035	0.692348	0.680881	0.679929	0.681956	0.674856	0.668243	0.699694	0.684711	0.675465	0.654335	0.673075
184	0.762882	0.808702	0.834226	0.780762	0.832939	0.814982	0.767593	0.711788	0.802822	0.774559	0.744004	0.683997	0.783293	0.85398	0.855954	0.778973	0.844071	0.820163	0.764837	0.702782	0.811737	0.78529	0.749118	0.68133	0.798797	0.861856	0.845337	0.770783	0.835276	0.793988	0.760158	0.703148	0.805849	0.783835	0.73981	0.678046	0.690161	0.69013	0.688271	0.680887	0.679744	0.681266	0.674121	0.6671	0.699223	0.685812	0.676548	0.656237	0.676035
185	0.762068	0.806374	0.833793	0.777059	0.834063	0.819038	0.768711	0.712338	0.802539	0.77472	0.745149	0.682626	0.782765	0.854548	0.85725	0.781478	0.843377	0.823001	0.76428	0.707072	0.815989	0.784821	0.748287	0.681387	0.799431	0.862624	0.847038	0.775558	0.833217	0.791208	0.758128	0.702981	0.803457	0.78365	0.73832	0.67877	0.690987	0.689864	0.688823	0.682706	0.680389	0.681412	0.67633	0.666885	0.698366	0.686222	0.676031	0.654173	0.676102
186	0.762654	0.812168	0.836187	0.781069	0.833564	0.816529	0.771022	0.712007	0.802262	0.777894	0.744297	0.683996	0.783724	0.854291	0.855146	0.780668	0.845204	0.823209	0.762123	0.708654	0.815315	0.783665	0.749716	0.680868	0.799938	0.861512	0.846421	0.772907	0.832959	0.794004	0.758595	0.70275	0.803057	0.782756	0.738429	0.679204	0.690568	0.692286	0.688924	0.682119	0.68068	0.682365	0.67563	0.666602	0.697413	0.686677	0.67547	0.654176	0.676987
187	0.762994	0.806111	0.832296	0.778518	0.834599	0.817675	0.766843	0.711154	0.802688	0.771721	0.745063	0.681501	0.783516	0.854695	0.857243	0.779063	0.846515	0.822278	0.764459	0.705177	0.812385	0.784791	0.750391	0.680931	0.800326	0.862613	0.848837	0.774247	0.835462	0.792199	0.758722	0.706052	0.804585	0.783961	0.739891	0.680255	0.691588	0.693456	0.689267	0.682475	0.679955	0.6784	0.672962	0.6665	0.699103	0.686175	0.675514	0.653194	0.678059
188	0.763223	0.80953	0.83347	0.781084	0.834942	0.816597	0.767192	0.711474	0.802568	0.774289	0.74523	0.684627	0.784336	0.85276	0.860339	0.779949	0.845799	0.824625	0.765152	0.708832	0.815476	0.786956	0.748435	0.681408	0.79986	0.862072	0.847757	0.772121	0.836499	0.791699	0.759278	0.703228	0.805308	0.783753	0.740308	0.681117	0.692456	0.691969	0.689718	0.681726	0.678386	0.68011	0.676313	0.665641	0.699854	0.686986	0.675002	0.654677	0.676801
189	0.761807	0.808314	0.83675	0.77923	0.834546	0.815328	0.769869	0.708474	0.8019	0.772531	0.744354	0.683053	0.784418	0.85542	0.859571	0.779966	0.844581	0.823723	0.767053	0.707318	0.814406	0.78376	0.748302	0.680694	0.798828	0.86169	0.847349	0.777356	0.834904	0.793846	0.757254	0.704104	0.805078	0.784292	0.739772	0.679163	0.691601	0.689187	0.69	0.681533	0.67885	0.677393	0.677608	0.665442	0.696796	0.686732	0.67758	0.655435	0.677593
190	0.764308	0.805806	0.834498	0.78025	0.83578	0.819841	0.767471	0.712945	0.801864	0.776955	0.744877	0.685436	0.782554	0.853545	0.858154	0.781388	0.844007	0.821683	0.766616	0.705625	0.816046	0.786766	0.750261	0.682766	0.800459	0.863605	0.846972	0.775065	0.832026	0.790984	0.759777	0.703316	0.804749	0.783161	0.739048	0.678138	0.691044	0.691535	0.689662	0.681367	0.677409	0.677243	0.67726	0.664976	0.698207	0.688996	0.674428	0.654789	0.676444
191	0.76021	0.809671	0.832567	0.776631	0.834482	0.816163	0.768974	0.710261	0.803367	0.772812	0.746676	0.682945	0.783741	0.855854	0.860912	0.783565	0.843765	0.823855	0.764483	0.706485	0.815482	0.784404	0.748468	0.681529	0.800443	0.864282	0.849022	0.773435	0.83534	0.791538	0.759663	0.705536	0.804078	0.784746	0.739328	0.680019	0.690568	0.691186	0.688545	0.681745	0.677372	0.679866	0.677053	0.663682	0.70107	0.686841	0.674519	0.65487	0.679804
192	0.764824	0.805646	0.83593	0.781585	0.832627	0.819124	0.767082	0.712249	0.8045	0.775426	0.746047	0.683163	0.783504	0.850551	0.858871	0.779433	0.844929	0.823026	0.764461	0.709018	0.815323	0.784306	0.75029	0.681839	0.799597	0.862772	0.846883	0.776812	0.835201	0.792456	0.759869	0.706488	0.803665	0.785145	0.738494	0.681594	0.692206	0.688194	0.689257	0.682864	0.678374	0.677469	0.676521	0.667778	0.700477	0.685876	0.675287	0.655167	0.681698
193	0.75906	0.809567	0.836577	0.779343	0.835769	0.81675	0.768087	0.714144	0.803594	0.772699	0.747263	0.685991	0.783399	0.856708	0.858912	0.78005	0.846654	0.823305	0.767065	0.705859	0.815439	0.785581	0.747692	0.682199	0.799015	0.862444	0.848242	0.771392	0.838998	0.790225	0.760325	0.704337	0.802899	0.783151	0.739466	0.680533	0.690605	0.688919	0.689728	0.682606	0.680907	0.678027	0.678058	0.667082	0.701306	0.687146	0.674597	0.65447	0.679138
194	0.764354	0.810413	0.835723	0.78224	0.836023	0.816406	0.769512	0.712457	0.803611	0.776107	0.744647	0.684786	0.784167	0.85362	0.859837	0.782445	0.846582	0.821703	0.766908	0.705963	0.814683	0.784297	0.750454	0.68076	0.800606	0.86435	0.849479	0.773182	0.835758	0.79321	0.757064	0.704404	0.803246	0.783603	0.739273	0.680845	0.690207	0.69265	0.687385	0.680054	0.680123	0.678061	0.675836	0.666699	0.701575	0.685296	0.676861	0.654018	0.678473
195	0.762324	0.806104	0.833942	0.781514	0.834435	0.818007	0.76841	0.714037	0.802415	0.776189	0.748521	0.683222	0.782439	0.855511	0.858363	0.780884	0.846419	0.822907	0.768057	0.708591	0.816792	0.786106	0.750378	0.680911	0.80098	0.864085	0.84965	0.776404	0.835466	0.79155	0.761636	0.705207	0.805955	0.784051	0.738421	0.680315	0.691289	0.690583	0.687805	0.681933	0.679206	0.677256	0.675988	0.666006	0.7011	0.686035	0.676397	0.656299	0.676369
196	0.761838	0.807248	0.836624	0.78108	0.836261	0.818426	0.769431	0.714492	0.803966	0.77643	0.746813	0.684258	0.785475	0.857265	0.861108	0.782127	0.842613	0.821	0.764899	0.705025	0.815937	0.784172	0.749472	0.680228	0.799101	0.861506	0.852489	0.773507	0.838981	0.793159	0.760501	0.706035	0.807322	0.784854	0.738015	0.680201	0.689197	0.689866	0.688292	0.682102	0.679458	0.676864	0.673667	0.668559	0.700664	0.685904	0.676621	0.655111	0.675922
197	0.76102	0.808782	0.836948	0.780266	0.833948	0.816264	0.767389	0.714783	0.803019	0.775681	0.746555	0.682687	0.782932	0.854083	0.857166	0.781884	0.843986	0.821727	0.765389	0.709818	0.816205	0.7871	0.751021	0.681687	0.799533	0.862282	0.849577	0.774411	0.836494	0.793332	0.760514	0.705753	0.806389	0.786261	0.739128	0.681796	0.690433	0.692888	0.688182	0.681641	0.680741	0.67701	0.677474	0.667599	0.701557	0.685568	0.675361	0.65511	0.677538
198	0.763049	0.806863	0.836889	0.782311	0.833359	0.817929	0.768701	0.711189	0.804051	0.776722	0.744969	0.684953	0.785573	0.857024	0.860903	0.780608	0.843265	0.820005	0.765896	0.705994	0.816557	0.788019	0.749399	0.679694	0.800022	0.864601	0.850931	0.775705	0.837823	0.792706	0.759065	0.70668	0.805006	0.786454	0.739781	0.680179	0.693645	0.691795	0.688619	0.68071	0.682306	0.678328	0.676725	0.668892	0.702236	0.686915	0.674406	0.653154	0.679229
199	0.761192	0.807988	0.831805	0.78224	0.836693	0.815214	0.769005	0.709753	0.804635	0.775775	0.746961	0.688605	0.782815	0.852729	0.861269	0.781346	0.845277	0.823275	0.768605	0.708394	0.818163	0.784628	0.750151	0.682067	0.799395	0.865306	0.854061	0.774747	0.83859	0.791547	0.758181	0.706633	0.804396	0.785099	0.739048	0.678887	0.694167	0.692827	0.688195	0.682315	0.681672	0.680646	0.676881	0.66891	0.702406	0.686573	0.672708	0.654843	0.676319
200	0.762778	0.807713	0.837505	0.780828	0.835285	0.821182	0.769046	0.711592	0.802777	0.775259	0.745443	0.68664	0.784529	0.855526	0.859462	0.781532	0.845436	0.822209	0.765861	0.707894	0.814659	0.786392	0.749158	0.682548	0.799174	0.86407	0.852233	0.776725	0.838159	0.791798	0.760471	0.705628	0.806763	0.784072	0.740829	0.679329	0.691088	0.692761	0.688443	0.683375	0.682026	0.679228	0.675871	0.670615	0.69952	0.687858	0.674622	0.653599	0.675625
201	0.761558	0.807274	0.835735	0.780686	0.835285	0.816984	0.772044	0.713317	0.805127	0.777186	0.745509	0.681228	0.78257	0.853634	0.863037	0.781726	0.846153	0.821913	0.764939	0.705815	0.818497	0.785993	0.750722	0.680585	0.801832	0.865542	0.851128	0.772171	0.837664	0.791107	0.762066	0.705023	0.807904	0.787219	0.739419	0.679709	0.691189	0.693511	0.687376	0.682883	0.682355	0.677627	0.676714	0.669655	0.702085	0.687463	0.67485	0.65344	0.678711
202	0.763645	0.807623	0.834777	0.780752	0.837811	0.81978	0.769006	0.713973	0.800435	0.775956	0.745658	0.685083	0.785349	0.853509	0.861743	0.782316	0.846203	0.822582	0.766277	0.709547	0.818289	0.786903	0.749252	0.680234	0.800312	0.863144	0.850349	0.774319	0.840404	0.792851	0.761488	0.704191	0.806992	0.786044	0.739641	0.681043	0.691467	0.693056	0.689505	0.682151	0.679919	0.678363	0.677143	0.668502	0.701999	0.689147	0.674648	0.653879	0.679448
203	0.762547	0.812679	0.838869	0.780491	0.836786	0.817235	0.76985	0.711694	0.802656	0.779591	0.747116	0.686325	0.781553	0.855311	0.859933	0.780957	0.847328	0.822814	0.768465	0.707822	0.817112	0.785942	0.750351	0.680857	0.800241	0.863823	0.85357	0.772876	0.838042	0.79365	0.761493	0.706075	0.805628	0.786319	0.740243	0.682233	0.69439	0.697757	0.689734	0.681938	0.680025	0.679934	0.674993	0.668178	0.701509	0.69053	0.676555	0.653985	0.678656
204	0.762304	0.805022	0.835602	0.78216	0.835931	0.81992	0.771119	0.710103	0.804274	0.776391	0.744622	0.684971	0.785019	0.855678	0.863579	0.781912	0.846926	0.823613	0.76623	0.706792	0.818633	0.787732	0.748147	0.679741	0.80111	0.867023	0.852062	0.777296	0.839718	0.791012	0.762559	0.704342	0.806414	0.787163	0.738753	0.681691	0.693677	0.693393	0.691197	0.682288	0.680121	0.68154	0.674923	0.666295	0.702195	0.6894	0.676618	0.652613	0.679564
205	0.763491	0.810374	0.83792	0.782308	0.837016	0.819392	0.768725	0.71112	0.802398	0.776651	0.743905	0.684898	0.783386	0.854868	0.859437	0.783375	0.846544	0.822461	0.768014	0.707663	0.818062	0.788349	0.752085	0.682725	0.80046	0.864808	0.852399	0.775185	0.841006	0.795295	0.761338	0.708024	0.807536	0.784775	0.738463	0.68049	0.692866	0.695171	0.689283	0.683484	0.681383	0.680538	0.67677	0.670254	0.701707	0.689754	0.676456	0.653637	0.677821
206	0.762349	0.806591	0.836342	0.779218	0.836635	0.821592	0.767205	0.710813	0.80593	0.778343	0.744083	0.684991	0.785828	0.855008	0.861414	0.781915	0.847833	0.818725	0.769472	0.70982	0.818052	0.785494	0.751124	0.680932	0.801385	0.864794	0.855314	0.774304	0.840864	0.792221	0.759761	0.704422	0.809141	0.787586	0.738083	0.680325	0.693899	0.695659	0.68971	0.681955	0.681162	0.679058	0.676465	0.668028	0.703623	0.688356	0.674401	0.655039	0.678344
207	0.764497	0.811148	0.836493	0.779813	0.836034	0.816501	0.77157	0.714691	0.803762	0.775857	0.747401	0.684396	0.784364	0.853529	0.863047	0.781903	0.845379	0.822659	0.768428	0.708774	0.819819	0.787768	0.749008	0.681559	0.801387	0.864856	0.853497	0.775736	0.841402	0.794471	0.761673	0.710267	0.808861	0.785583	0.738166	0.679902	0.690989	0.693804	0.688398	0.681626	0.679704	0.680576	0.676633	0.665484	0.703022	0.689432	0.673714	0.652592	0.679488
208	0.762988	0.806827	0.837147	0.779932	0.836578	0.816766	0.767694	0.712721	0.8047	0.777968	0.746667	0.68642	0.782684	0.855176	0.86204	0.782608	0.848887	0.823357	0.768156	0.706701	0.816355	0.786552	0.751738	0.680395	0.800438	0.863003	0.854225	0.773617	0.840444	0.794943	0.761788	0.705647	0.808912	0.786398	0.739183	0.679036	0.691441	0.693039	0.687465	0.681484	0.683932	0.681935	0.675015	0.665718	0.703673	0.687874	0.671908	0.652884	0.678618
209	0.763609	0.809702	0.8365	0.781038	0.836068	0.819927	0.768693	0.710174	0.80428	0.7766	0.747084	0.684923	0.783498	0.854097	0.862317	0.78114	0.847839	0.822923	0.766179	0.709804	0.818669	0.787989	0.750946	0.681159	0.802606	0.863191	0.852915	0.776284	0.840741	0.79403	0.761722	0.706347	0.807571	0.784281	0.739879	0.679724	0.692037	0.693424	0.689401	0.681859	0.681277	0.679923	0.675886	0.668147	0.703065	0.688594	0.672751	0.6539	0.677241
210	0.764165	0.809254	0.837369	0.782632	0.838486	0.81752	0.772941	0.710689	0.804664	0.778902	0.74625	0.685026	0.783946	0.856858	0.860948	0.782217	0.849303	0.8233	0.767343	0.706746	0.818538	0.786588	0.750996	0.681539	0.8004	0.866893	0.853778	0.77738	0.843153	0.794892	0.764617	0.70515	0.806893	0.784184	0.740369	0.680079	0.694341	0.695025	0.688427	0.681992	0.681144	0.679536	0.675341	0.667187	0.704828	0.689011	0.672485	0.654604	0.6781
211	0.763599	0.810405	0.836195	0.782971	0.835871	0.817853	0.767849	0.712409	0.805366	0.778649	0.745604	0.687016	0.784665	0.854614	0.863707	0.781859	0.850696	0.821892	0.768446	0.709338	0.818516	0.786076	0.749542	0.679684	0.802496	0.865635	0.853621	0.775539	0.841039	0.793423	0.761787	0.706326	0.807739	0.785253	0.739632	0.679064	0.695311	0.696161	0.688826	0.680614	0.682321	0.678207	0.675971	0.667107	0.70335	0.688113	0.671226	0.653325	0.679268
212	0.762634	0.80886	0.836177	0.78328	0.838813	0.817137	0.772016	0.712797	0.802691	0.776943	0.747936	0.687003	0.784077	0.854785	0.864702	0.78546	0.848283	0.820766	0.76782	0.704688	0.819779	0.787936	0.751363	0.680488	0.80305	0.86281	0.852647	0.776647	0.842653	0.794058	0.762115	0.705868	0.809253	0.784537	0.73921	0.677566	0.693423	0.695564	0.687963	0.680033	0.683323	0.682123	0.673139	0.665855	0.703852	0.687148	0.673749	0.653858	0.677786
213	0.763987	0.811204	0.839721	0.781951	0.83776	0.819333	0.770998	0.712123	0.806293	0.776448	0.747533	0.681703	0.783622	0.857925	0.863237	0.784324	0.848996	0.824179	0.768814	0.709015	0.820658	0.786571	0.750331	0.681546	0.801523	0.866091	0.853366	0.779944	0.841857	0.793133	0.760114	0.705786	0.808303	0.786236	0.739056	0.679762	0.693977	0.693669	0.689709	0.682388	0.683232	0.681065	0.676022	0.666662	0.704807	0.68894	0.675333	0.653001	0.678732
214	0.763587	0.811929	0.838766	0.783725	0.836666	0.818367	0.771728	0.713662	0.804004	0.776266	0.746441	0.685187	0.783901	0.856101	0.863692	0.783863	0.850071	0.823993	0.768605	0.707563	0.818241	0.786693	0.748722	0.680258	0.802497	0.867665	0.854818	0.776521	0.844354	0.794584	0.761355	0.704665	0.809009	0.787277	0.740516	0.681967	0.692839	0.69631	0.690812	0.681429	0.68245	0.681856	0.678749	0.666843	0.702516	0.688909	0.675675	0.652378	0.677535
215	0.764396	0.809213	0.833304	0.789135	0.837586	0.819114	0.771464	0.709262	0.805814	0.776545	0.746071	0.690159	0.782765	0.858357	0.865018	0.782925	0.848572	0.82395	0.771302	0.709652	0.817102	0.787253	0.751676	0.680643	0.801284	0.866967	0.853459	0.780591	0.842934	0.796035	0.761886	0.704255	0.807618	0.787799	0.7399	0.682139	0.695164	0.695204	0.693136	0.679933	0.67957	0.680791	0.676101	0.667	0.702958	0.688465	0.675169	0.655516	0.676338
216	0.762337	0.811285	0.84039	0.782925	0.835282	0.81847	0.774956	0.714791	0.804984	0.777205	0.745263	0.684719	0.784664	0.856125	0.864861	0.783633	0.849749	0.824225	0.769142	0.70929	0.822217	0.787552	0.749634	0.682123	0.80346	0.866322	0.854376	0.774779	0.843676	0.795141	0.763872	0.704745	0.809228	0.785501	0.739961	0.682077	0.692797	0.692103	0.689185	0.680987	0.68136	0.681867	0.676578	0.66756	0.705895	0.688947	0.674838	0.654404	0.676649
217	0.766283	0.809437	0.838671	0.783957	0.839748	0.82186	0.769938	0.714162	0.807449	0.775849	0.744717	0.685642	0.783598	0.857467	0.866653	0.783316	0.849557	0.823205	0.769188	0.70716	0.821141	0.786315	0.750915	0.68105	0.803013	0.866222	0.853965	0.779436	0.845231	0.79563	0.761444	0.705299	0.809924	0.786506	0.739242	0.68059	0.694615	0.693892	0.688298	0.681191	0.681529	0.681663	0.676994	0.666782	0.702711	0.68791	0.675911	0.654583	0.677968
218	0.765181	0.810831	0.840956	0.784125	0.835338	0.818273	0.771285	0.711268	0.804184	0.778087	0.74605	0.686285	0.784543	0.85629	0.862893	0.784143	0.849849	0.824257	0.769233	0.707215	0.817725	0.787615	0.750111	0.680401	0.801924	0.866318	0.851803	0.775069	0.844499	0.796869	0.762331	0.704725	0.81005	0.786239	0.738616	0.679878	0.694295	0.692431	0.688865	0.679212	0.684032	0.681785	0.676824	0.667656	0.704129	0.687961	0.675398	0.653914	0.67447
219	0.763936	0.808804	0.838157	0.785521	0.83887	0.818217	0.770263	0.713833	0.803845	0.776863	0.746457	0.685717	0.784902	0.858013	0.863307	0.782398	0.848525	0.823305	0.76819	0.706318	0.821644	0.787745	0.747904	0.680437	0.802813	0.866144	0.854236	0.777248	0.845096	0.795965	0.761522	0.705867	0.809932	0.788149	0.73997	0.678888	0.69455	0.694264	0.688123	0.679653	0.683016	0.681692	0.676352	0.667114	0.70458	0.690806	0.674345	0.654092	0.675545
220	0.764099	0.814045	0.840494	0.783101	0.836333	0.818983	0.767754	0.711235	0.8069	0.779241	0.748055	0.685702	0.784402	0.856316	0.863348	0.781595	0.852278	0.82512	0.76863	0.711062	0.822409	0.786363	0.752532	0.681376	0.802798	0.865899	0.854624	0.778311	0.842763	0.793992	0.762748	0.703749	0.810781	0.786536	0.740502	0.679517	0.693118	0.694478	0.689875	0.681804	0.683769	0.681867	0.678302	0.666027	0.704831	0.6894	0.671401	0.654336	0.679335
221	0.765351	0.806325	0.83641	0.783174	0.836571	0.817518	0.774802	0.71161	0.80412	0.774941	0.74601	0.684261	0.785046	0.854666	0.865068	0.781133	0.849	0.825202	0.768873	0.710286	0.817597	0.788664	0.751212	0.681263	0.804116	0.867897	0.856158	0.779931	0.843849	0.794822	0.762109	0.705437	0.809461	0.785998	0.741121	0.680584	0.691345	0.694077	0.691743	0.68206	0.683306	0.68017	0.677464	0.666935	0.705502	0.687766	0.671629	0.654294	0.678554
222	0.763403	0.810999	0.837195	0.786383	0.835121	0.818218	0.771282	0.712131	0.807441	0.776374	0.746927	0.685712	0.782673	0.856129	0.864582	0.782384	0.851296	0.823189	0.768642	0.710334	0.820998	0.78763	0.750969	0.679865	0.803658	0.867741	0.856338	0.779372	0.844336	0.796858	0.764373	0.705234	0.810178	0.787767	0.740212	0.681724	0.692429	0.694228	0.690372	0.683022	0.682693	0.680094	0.676488	0.666841	0.703914	0.688459	0.672385	0.653949	0.678313
223	0.765017	0.810651	0.839074	0.78351	0.838928	0.820126	0.772115	0.712965	0.80755	0.776635	0.747791	0.683674	0.785298	0.854849	0.864936	0.78054	0.850922	0.824978	0.768449	0.710622	0.822486	0.787406	0.750664	0.680846	0.803372	0.869396	0.854042	0.779418	0.845065	0.795759	0.762085	0.708853	0.810504	0.785283	0.740729	0.681	0.694964	0.694445	0.692131	0.681989	0.681263	0.679495	0.678141	0.667737	0.703004	0.688213	0.672535	0.653693	0.677486
224	0.765478	0.812113	0.839062	0.785321	0.834512	0.820536	0.772866	0.71308	0.807837	0.776545	0.74625	0.683402	0.782701	0.857982	0.86628	0.780993	0.852998	0.824082	0.77093	0.708282	0.818177	0.788326	0.750342	0.681952	0.803792	0.870442	0.853909	0.776796	0.843381	0.797209	0.765324	0.70737	0.812235	0.786745	0.741135	0.681023	0.692387	0.694929	0.690172	0.680942	0.679387	0.680172	0.679348	0.668737	0.702287	0.688138	0.672949	0.654801	0.676272
225	0.76242	0.814483	0.839558	0.786138	0.837485	0.820869	0.771396	0.7148	0.807799	0.77827	0.746801	0.685144	0.78565	0.855994	0.867392	0.782599	0.84958	0.823278	0.768923	0.708346	0.820707	0.787294	0.749929	0.680706	0.804158	0.866201	0.855196	0.782468	0.845561	0.795184	0.761831	0.705021	0.811398	0.785393	0.74082	0.682427	0.695358	0.693885	0.690339	0.680618	0.682756	0.682854	0.677862	0.667595	0.703174	0.689134	0.674057	0.654385	0.67711
226	0.76697	0.809211	0.836577	0.784081	0.836249	0.817733	0.772855	0.709871	0.806573	0.778558	0.745911	0.685124	0.784268	0.856432	0.866259	0.78331	0.851442	0.827509	0.768321	0.710228	0.821958	0.789496	0.74959	0.681063	0.802767	0.868296	0.856336	0.775376	0.844993	0.796714	0.760214	0.705303	0.81047	0.787862	0.742223	0.68227	0.693048	0.694895	0.689246	0.681834	0.682975	0.678358	0.676756	0.667659	0.703751	0.688898	0.673037	0.654762	0.678529
227	0.763464	0.810957	0.837185	0.784162	0.838423	0.821799	0.771189	0.710462	0.806333	0.776647	0.743034	0.686815	0.783897	0.857153	0.86744	0.77947	0.853912	0.826419	0.769051	0.708871	0.82075	0.7846	0.749444	0.680984	0.804226	0.868754	0.858551	0.778683	0.84523	0.79369	0.761484	0.703525	0.812067	0.787268	0.739105	0.679306	0.692872	0.695299	0.690299	0.681498	0.684698	0.678571	0.679812	0.668013	0.703143	0.688614	0.67196	0.654191	0.678016
228	0.762336	0.81226	0.839992	0.785959	0.838228	0.815271	0.77489	0.711352	0.807689	0.777437	0.743841	0.687346	0.784324	0.858321	0.8651	0.783433	0.850489	0.827662	0.769695	0.70915	0.820664	0.789194	0.752939	0.680399	0.804397	0.867235	0.858762	0.780104	0.848221	0.796654	0.762032	0.706307	0.812126	0.786077	0.738929	0.680703	0.693964	0.694847	0.691583	0.68124	0.681576	0.680414	0.680296	0.668781	0.704899	0.689809	0.67425	0.654779	0.677411
229	0.762616	0.813436	0.838025	0.78562	0.838683	0.821353	0.772139	0.715741	0.805891	0.779909	0.745812	0.685825	0.783051	0.858082	0.86747	0.78529	0.854369	0.824193	0.768801	0.709975	0.821407	0.788015	0.750283	0.680323	0.803301	0.869683	0.858457	0.777458	0.847423	0.796121	0.763914	0.705099	0.810462	0.786164	0.740206	0.68224	0.694312	0.694532	0.69095	0.680113	0.680902	0.682729	0.680631	0.66785	0.703062	0.692064	0.673063	0.654857	0.680753
230	0.764272	0.810941	0.841935	0.78697	0.841396	0.816584	0.772417	0.712903	0.807753	0.778899	0.746155	0.685239	0.78583	0.858144	0.865646	0.781211	0.853361	0.825051	0.769794	0.707814	0.821013	0.788006	0.750453	0.681951	0.80563	0.87106	0.858947	0.777312	0.846102	0.79535	0.761244	0.70759	0.810696	0.785964	0.739406	0.681373	0.696921	0.692708	0.690287	0.681299	0.681828	0.681044	0.676779	0.665717	0.703643	0.690122	0.674384	0.653114	0.680558
231	0.763479	0.809878	0.841566	0.787055	0.839632	0.82138	0.773258	0.710318	0.808012	0.778935	0.747204	0.684972	0.782967	0.856879	0.866699	0.783519	0.853611	0.824958	0.769763	0.710696	0.821913	0.787339	0.751754	0.681469	0.804166	0.871604	0.857642	0.779177	0.845703	0.797865	0.761687	0.706189	0.813116	0.787958	0.740805	0.680332	0.695705	0.693982	0.689179	0.682567	0.682314	0.678037	0.678602	0.666065	0.703406	0.689134	0.674977	0.652037	0.678737
232	0.760631	0.814135	0.837117	0.785129	0.840517	0.816755	0.774797	0.715189	0.804927	0.777025	0.743677	0.686518	0.785999	0.856705	0.867292	0.783358	0.851318	0.826749	0.768592	0.709112	0.821466	0.787967	0.751055	0.680842	0.802577	0.871049	0.855656	0.778557	0.845347	0.79688	0.76235	0.706756	0.813783	0.786398	0.739953	0.681718	0.69644	0.694015	0.689366	0.681631	0.683148	0.677857	0.67803	0.66631	0.703828	0.691634	0.674181	0.653016	0.680769
233	0.765456	0.811468	0.839814	0.788556	0.838786	0.821036	0.773638	0.712264	0.807084	0.779872	0.743379	0.685903	0.783631	0.855614	0.868902	0.784345	0.85385	0.827225	0.770802	0.707893	0.821733	0.78814	0.750113	0.681957	0.804438	0.870593	0.857577	0.777312	0.848374	0.795347	0.765098	0.70636	0.813161	0.786466	0.740534	0.682547	0.693482	0.693246	0.689093	0.679831	0.683383	0.677465	0.677847	0.665031	0.705473	0.691579	0.674613	0.65389	0.680326
234	0.761049	0.813714	0.842045	0.784245	0.842171	0.819895	0.775688	0.713326	0.806609	0.778728	0.745838	0.683808	0.78487	0.857441	0.867475	0.782952	0.852789	0.826211	0.769223	0.708351	0.821448	0.789384	0.750361	0.680829	0.804535	0.872498	0.85719	0.782555	0.851678	0.794474	0.763779	0.709039	0.810937	0.787152	0.739551	0.681649	0.694565	0.693069	0.69003	0.681782	0.682907	0.678131	0.678764	0.664813	0.704844	0.691098	0.674247	0.653283	0.680298
235	0.764011	0.813617	0.837992	0.791863	0.838191	0.818283	0.776511	0.713564	0.808867	0.779214	0.748333	0.688012	0.784456	0.857739	0.865768	0.782715	0.853729	0.823722	0.768496	0.707664	0.821326	0.788136	0.752909	0.681519	0.803909	0.871878	0.858545	0.777756	0.848995	0.79738	0.761781	0.706439	0.813362	0.786733	0.73986	0.680984	0.691781	0.692362	0.69104	0.683066	0.682623	0.67953	0.677701	0.666651	0.703384	0.689479	0.672555	0.652886	0.679336
236	0.76208	0.814567	0.842682	0.784592	0.839265	0.82378	0.771925	0.711778	0.806259	0.7789	0.747318	0.686436	0.783682	0.858671	0.869689	0.782712	0.85443	0.827084	0.771491	0.709661	0.823873	0.789095	0.750973	0.679443	0.80504	0.871419	0.858248	0.778861	0.850084	0.797854	0.763936	0.707292	0.81235	0.786405	0.740643	0.68187	0.693577	0.692414	0.693083	0.682742	0.677609	0.67936	0.675425	0.668998	0.705423	0.690746	0.673935	0.654345	0.680153
237	0.763338	0.810697	0.841304	0.786713	0.842285	0.816743	0.77531	0.71384	0.809634	0.778885	0.744657	0.686247	0.786706	0.857189	0.86593	0.784199	0.855107	0.826681	0.769377	0.708617	0.823115	0.790689	0.751816	0.682318	0.803837	0.87186	0.857513	0.779801	0.849409	0.796061	0.759754	0.706274	0.812553	0.78705	0.739637	0.680377	0.691677	0.694596	0.691688	0.682357	0.680935	0.679716	0.678247	0.667315	0.705157	0.692442	0.676084	0.652508	0.68171
238	0.762718	0.812001	0.838766	0.788481	0.836148	0.818658	0.775296	0.713189	0.80783	0.781166	0.746807	0.686831	0.783854	0.859241	0.869373	0.785605	0.854481	0.827486	0.771318	0.707329	0.821663	0.78756	0.752181	0.681155	0.803799	0.870743	0.860029	0.776831	0.847495	0.795023	0.764227	0.704078	0.812133	0.78675	0.740355	0.679491	0.696092	0.696591	0.690643	0.68224	0.68254	0.68117	0.676673	0.666152	0.705021	0.691969	0.67641	0.653619	0.682191
239	0.764318	0.812431	0.844743	0.7855	0.841456	0.821074	0.772077	0.71464	0.808373	0.778609	0.749803	0.68396	0.786019	0.857921	0.867045	0.783334	0.854017	0.827614	0.773151	0.709519	0.822034	0.788553	0.752022	0.68141	0.804494	0.871987	0.858986	0.78255	0.852148	0.797454	0.76322	0.707899	0.813421	0.78775	0.738319	0.68111	0.693294	0.691287	0.691089	0.682465	0.680628	0.681032	0.67865	0.668925	0.705463	0.691455	0.676971	0.653745	0.681078
240	0.765289	0.812237	0.840409	0.79158	0.837544	0.822192	0.775894	0.716019	0.809326	0.780082	0.746737	0.684644	0.784863	0.858243	0.868142	0.785397	0.85384	0.825531	0.772286	0.709556	0.822852	0.789005	0.750177	0.680842	0.804427	0.875161	0.855931	0.776468	0.848042	0.796386	0.761144	0.706368	0.814554	0.786037	0.737951	0.682656	0.691125	0.691747	0.690429	0.683633	0.680794	0.681056	0.679261	0.665349	0.705524	0.690622	0.675049	0.654098	0.680165
241	0.764812	0.812531	0.843606	0.790112	0.83982	0.818264	0.770538	0.712796	0.808821	0.777	0.747793	0.686048	0.784779	0.857741	0.868296	0.782688	0.854766	0.82762	0.769183	0.708753	0.822852	0.789917	0.752458	0.680741	0.805389	0.873338	0.858061	0.779034	0.8491	0.796376	0.763931	0.707143	0.813388	0.786008	0.738619	0.68356	0.689211	0.689404	0.690333	0.683781	0.68148	0.679742	0.67908	0.664696	0.704244	0.689107	0.674857	0.655129	0.680524
242	0.762597	0.813476	0.845636	0.787033	0.839687	0.820596	0.774788	0.715207	0.809638	0.780512	0.747302	0.684406	0.785072	0.858279	0.86712	0.782415	0.854384	0.825738	0.770709	0.70654	0.822248	0.788193	0.7523	0.67966	0.80342	0.87121	0.858574	0.779081	0.84923	0.795401	0.76141	0.70673	0.813149	0.787278	0.737714	0.684165	0.693688	0.691939	0.690005	0.682208	0.680309	0.680765	0.678	0.665165	0.704234	0.690196	0.67723	0.654434	0.679875
243	0.763119	0.813422	0.839204	0.787315	0.83965	0.816585	0.773075	0.713712	0.808675	0.779748	0.747327	0.68432	0.7861	0.859385	0.869621	0.783287	0.853892	0.828271	0.769497	0.709473	0.823238	0.78961	0.750722	0.681308	0.804226	0.874269	0.859601	0.776909	0.851676	0.796376	0.76498	0.707643	0.813148	0.786786	0.738686	0.68192	0.692742	0.691597	0.691243	0.683041	0.680338	0.680261	0.677757	0.66689	0.706252	0.688676	0.676247	0.65365	0.679391
244	0.763076	0.81032	0.843599	0.787591	0.838644	0.818576	0.773275	0.713668	0.809161	0.778497	0.746959	0.686971	0.784785	0.858494	0.866172	0.781847	0.853818	0.827458	0.76866	0.711813	0.823316	0.788385	0.753449	0.681519	0.80442	0.874254	0.859714	0.78222	0.850888	0.796828	0.763149	0.707705	0.815259	0.787705	0.740893	0.682368	0.694277	0.692439	0.693219	0.680768	0.680208	0.681601	0.678682	0.666546	0.707348	0.68896	0.676162	0.653656	0.680027
245	0.763432	0.81329	0.839847	0.787679	0.839865	0.823339	0.774849	0.716641	0.808991	0.780977	0.746776	0.688045	0.78619	0.857051	0.869764	0.784143	0.853452	0.826501	0.770197	0.709264	0.824262	0.789013	0.749795	0.681389	0.803537	0.874395	0.860993	0.778852	0.851422	0.79427	0.760345	0.707757	0.813575	0.787122	0.739988	0.682944	0.693897	0.692381	0.691739	0.682063	0.679442	0.682526	0.677074	0.665259	0.704539	0.689406	0.676394	0.655105	0.682174
246	0.762718	0.809755	0.839308	0.788683	0.837548	0.820174	0.772933	0.713606	0.809054	0.777798	0.74785	0.68502	0.785032	0.85844	0.868551	0.784395	0.856614	0.824967	0.771536	0.711102	0.822437	0.788709	0.752948	0.680657	0.803833	0.873912	0.861711	0.782076	0.851389	0.800893	0.761735	0.705927	0.814406	0.789391	0.741047	0.68091	0.695205	0.691968	0.692654	0.681451	0.679662	0.6818	0.67772	0.665555	0.702243	0.688015	0.676438	0.652019	0.68363
247	0.763076	0.811553	0.840939	0.789525	0.841268	0.820044	0.77515	0.71572	0.811231	0.780487	0.744671	0.683928	0.785363	0.857335	0.868973	0.78319	0.854442	0.828155	0.770393	0.711031	0.822608	0.789379	0.749253	0.681262	0.802037	0.873891	0.860067	0.784077	0.851764	0.795386	0.762047	0.707723	0.813764	0.787336	0.741278	0.68172	0.692387	0.693592	0.692272	0.681903	0.680983	0.678396	0.674436	0.664987	0.703012	0.690517	0.674215	0.653561	0.6815
248	0.764253	0.811898	0.841289	0.790687	0.840639	0.822718	0.774396	0.712104	0.808067	0.779228	0.746756	0.685294	0.785951	0.859546	0.867564	0.785118	0.855234	0.826566	0.770751	0.706403	0.823093	0.788874	0.751896	0.680549	0.802048	0.874645	0.859907	0.781077	0.848568	0.797161	0.763788	0.707838	0.813312	0.787838	0.739258	0.682947	0.691514	0.695775	0.693545	0.682193	0.682097	0.680004	0.676027	0.666922	0.706825	0.69357	0.674597	0.654767	0.680519
249	0.765508	0.81401	0.845028	0.788021	0.840512	0.819624	0.774307	0.713097	0.812291	0.780255	0.747493	0.686228	0.785309	0.858929	0.869283	0.783495	0.85466	0.828791	0.772978	0.707858	0.824213	0.78951	0.75225	0.680622	0.802318	0.875302	0.862548	0.77959	0.8514	0.796457	0.7619	0.709543	0.813439	0.788451	0.74143	0.68214	0.693247	0.69353	0.694445	0.680453	0.683092	0.682811	0.678006	0.666768	0.70551	0.69087	0.676368	0.654813	0.683838
250	0.764851	0.813248	0.843637	0.789282	0.839362	0.820119	0.775066	0.719254	0.809239	0.778665	0.747608	0.686077	0.785179	0.86061	0.868252	0.782858	0.856326	0.829134	0.769697	0.71006	0.823384	0.789664	0.748787	0.680924	0.802684	0.873806	0.862215	0.77761	0.850728	0.795866	0.76345	0.70746	0.816538	0.787209	0.742088	0.682572	0.694183	0.692753	0.692612	0.680545	0.681156	0.681176	0.677623	0.664527	0.705536	0.691051	0.677914	0.655355	0.684611
251	0.762663	0.813617	0.841973	0.789764	0.841726	0.819958	0.776127	0.715381	0.809204	0.780604	0.747741	0.686055	0.78576	0.857829	0.868745	0.780564	0.854682	0.827627	0.770679	0.708344	0.823347	0.788598	0.753385	0.681477	0.802432	0.874145	0.863057	0.78216	0.852077	0.797408	0.764725	0.708651	0.815541	0.78896	0.741849	0.683488	0.694392	0.692877	0.69217	0.682776	0.679174	0.680725	0.677398	0.664139	0.704281	0.690599	0.678281	0.655465	0.68352
252	0.764686	0.814511	0.840519	0.786126	0.843039	0.821255	0.772989	0.713597	0.811623	0.777734	0.746675	0.685644	0.784331	0.857905	0.871226	0.78302	0.856431	0.828095	0.772293	0.711346	0.822584	0.789667	0.752281	0.681761	0.802407	0.878615	0.86149	0.777054	0.851674	0.794543	0.762524	0.706743	0.814354	0.786697	0.739887	0.682294	0.694205	0.694744	0.69172	0.681071	0.682518	0.683309	0.678919	0.665782	0.705707	0.689885	0.676836	0.653957	0.681297
253	0.761558	0.815634	0.84429	0.791582	0.843757	0.820459	0.774085	0.716486	0.80897	0.777865	0.745801	0.686731	0.786003	0.859788	0.870169	0.784779	0.854811	0.827387	0.770189	0.709622	0.824003	0.787307	0.751014	0.680831	0.802985	0.875857	0.860648	0.779157	0.851853	0.798083	0.763552	0.708634	0.816129	0.789018	0.73988	0.681323	0.692247	0.691421	0.690075	0.680496	0.680642	0.683447	0.681149	0.664559	0.70563	0.689258	0.673358	0.65147	0.680565
254	0.766276	0.814368	0.842406	0.789057	0.840513	0.820965	0.773583	0.713734	0.809759	0.780841	0.747172	0.687428	0.783323	0.860443	0.869159	0.785133	0.855406	0.829126	0.771031	0.70994	0.824778	0.78909	0.752252	0.680659	0.803097	0.874645	0.86329	0.782191	0.851817	0.797128	0.762074	0.706716	0.81572	0.788367	0.739137	0.68283	0.692385	0.692564	0.690273	0.682	0.681608	0.680355	0.680674	0.66582	0.705492	0.690177	0.675563	0.654125	0.682363
255	0.76507	0.814492	0.842148	0.793443	0.844778	0.818726	0.772522	0.714446	0.809691	0.77794	0.749021	0.687654	0.786654	0.860275	0.871713	0.786881	0.854202	0.830217	0.772124	0.709798	0.822362	0.787683	0.751616	0.680712	0.803199	0.874149	0.863214	0.780509	0.852422	0.798866	0.763194	0.705548	0.816317	0.787903	0.738906	0.684896	0.693543	0.6923	0.691392	0.682613	0.681242	0.68033	0.679582	0.665556	0.704311	0.690148	0.676709	0.652865	0.681861
256	0.763871	0.811223	0.842871	0.789086	0.838932	0.825891	0.77554	0.715844	0.81026	0.7807	0.747195	0.683699	0.784409	0.857501	0.871637	0.785151	0.85575	0.827894	0.769454	0.709897	0.825979	0.788756	0.749629	0.680515	0.802992	0.875604	0.862811	0.779053	0.853694	0.795998	0.764409	0.706791	0.815927	0.786509	0.739431	0.684176	0.69309	0.690681	0.688004	0.682734	0.678327	0.682257	0.678641	0.664992	0.704229	0.691037	0.676075	0.654403	0.681789
257	0.763331	0.816416	0.844008	0.78988	0.844956	0.818209	0.775083	0.715324	0.812276	0.780621	0.745632	0.688422	0.784292	0.860135	0.872415	0.787058	0.854986	0.82696	0.771533	0.711159	0.826019	0.790332	0.753558	0.680443	0.800919	0.876671	0.864088	0.782896	0.852971	0.798107	0.765381	0.708136	0.817092	0.785796	0.740004	0.682722	0.691921	0.691474	0.688762	0.682969	0.68154	0.682346	0.678467	0.665431	0.705978	0.692885	0.675858	0.654527	0.680887
258	0.764945	0.813341	0.842015	0.787025	0.841754	0.818431	0.775057	0.715882	0.80903	0.778541	0.748342	0.683033	0.783947	0.857861	0.87099	0.786045	0.85505	0.828343	0.772495	0.71028	0.823104	0.788392	0.753053	0.680532	0.804074	0.876205	0.864308	0.777561	0.852439	0.797238	0.765196	0.710276	0.815906	0.787837	0.740152	0.683218	0.694191	0.689409	0.688552	0.682145	0.682932	0.683802	0.679044	0.665695	0.707859	0.690329	0.67346	0.653459	0.68099
259	0.764293	0.814083	0.840253	0.792987	0.841107	0.820059	0.774515	0.714659	0.810872	0.780616	0.747177	0.684623	0.784909	0.860205	0.874312	0.786779	0.85431	0.829311	0.77055	0.708917	0.82361	0.790643	0.751632	0.681977	0.802042	0.877792	0.862868	0.78258	0.852174	0.796573	0.763622	0.708448	0.81562	0.78668	0.738761	0.682346	0.693009	0.695353	0.69094	0.683075	0.681649	0.684109	0.675439	0.667806	0.705095	0.689543	0.675363	0.655793	0.679614
260	0.764505	0.813249	0.842178	0.79002	0.839357	0.820562	0.775637	0.71535	0.808258	0.779712	0.748042	0.688204	0.783513	0.85924	0.870942	0.784775	0.856479	0.830261	0.771206	0.711138	0.824587	0.789926	0.752319	0.679471	0.801183	0.873653	0.864225	0.777264	0.851498	0.798577	0.764206	0.705844	0.816748	0.787575	0.740046	0.681314	0.694656	0.692031	0.69052	0.681957	0.680518	0.682322	0.67744	0.665943	0.703942	0.690635	0.675727	0.653308	0.67953
261	0.765915	0.813732	0.844156	0.791124	0.842936	0.822571	0.775907	0.714789	0.811099	0.779002	0.745888	0.689007	0.785623	0.861549	0.871765	0.782816	0.854657	0.829043	0.770307	0.707972	0.824159	0.787968	0.751736	0.681468	0.8026	0.875075	0.864948	0.780309	0.853356	0.796378	0.7635	0.708094	0.816207	0.787141	0.738369	0.68149	0.692568	0.69482	0.691131	0.681978	0.67983	0.681517	0.677561	0.666362	0.705052	0.689735	0.676682	0.653333	0.679201
262	0.765119	0.812057	0.841368	0.785026	0.841149	0.820191	0.775979	0.714358	0.810031	0.780436	0.749656	0.684402	0.784618	0.859582	0.873006	0.784131	0.857288	0.82649	0.770243	0.708102	0.823738	0.789214	0.752591	0.680876	0.802741	0.876664	0.864605	0.77903	0.854163	0.798747	0.76166	0.704597	0.816257	0.789328	0.74183	0.68172	0.693768	0.694271	0.689679	0.683111	0.681266	0.679666	0.676763	0.666053	0.703878	0.691638	0.67565	0.65374	0.680628
263	0.766636	0.813303	0.841329	0.789785	0.845055	0.822334	0.775923	0.712241	0.808559	0.780857	0.745586	0.684652	0.785483	0.860308	0.871075	0.784547	0.854945	0.829086	0.770125	0.711353	0.825864	0.789078	0.752338	0.679988	0.802013	0.874212	0.866503	0.780549	0.853191	0.798182	0.761847	0.706554	0.816971	0.789695	0.741452	0.681327	0.698009	0.693061	0.691117	0.683288	0.681196	0.684899	0.678198	0.666232	0.704644	0.691378	0.673385	0.654145	0.679974
264	0.764563	0.812535	0.843402	0.792282	0.842851	0.818387	0.776562	0.71812	0.810326	0.781163	0.748088	0.684582	0.78467	0.861463	0.870846	0.786253	0.855752	0.827778	0.770136	0.712142	0.825368	0.791555	0.750354	0.681904	0.801132	0.872689	0.864522	0.783183	0.855004	0.795821	0.764426	0.707039	0.817561	0.789092	0.740931	0.682966	0.698101	0.693188	0.691509	0.685061	0.681392	0.684355	0.679327	0.666249	0.704073	0.693637	0.674838	0.652905	0.679822
265	0.76531	0.81507	0.840877	0.793126	0.843444	0.820896	0.774247	0.715589	0.807808	0.781495	0.747461	0.686387	0.784904	0.862584	0.870987	0.783213	0.85583	0.829492	0.771438	0.709031	0.825328	0.788978	0.752623	0.68139	0.803997	0.874927	0.867516	0.779958	0.855509	0.798747	0.764322	0.706705	0.815814	0.787671	0.740705	0.686443	0.69501	0.694442	0.691629	0.682617	0.68344	0.679185	0.680098	0.666819	0.704297	0.693207	0.675297	0.652835	0.679946
266	0.763394	0.81058	0.842993	0.788872	0.8428	0.8192	0.776384	0.71607	0.811723	0.781452	0.746397	0.684792	0.784944	0.861363	0.871417	0.786348	0.85432	0.828779	0.771324	0.711305	0.825701	0.789671	0.752123	0.679697	0.801489	0.875896	0.867989	0.779041	0.852216	0.797896	0.76347	0.710204	0.815955	0.787573	0.739383	0.685196	0.695891	0.693032	0.69117	0.684619	0.684303	0.680645	0.679583	0.665521	0.704649	0.689604	0.675566	0.653731	0.679469
267	0.764404	0.813833	0.842347	0.78836	0.84356	0.817986	0.776711	0.715261	0.810832	0.779717	0.74806	0.685848	0.785357	0.859885	0.871875	0.786843	0.857841	0.82874	0.773873	0.71309	0.823956	0.790304	0.751512	0.680825	0.80179	0.873268	0.86569	0.782869	0.855378	0.798917	0.76267	0.70618	0.81669	0.786625	0.741044	0.683936	0.693853	0.694776	0.692172	0.686131	0.681436	0.681295	0.677707	0.666433	0.704804	0.691998	0.67686	0.652859	0.681218
268	0.76464	0.813832	0.844	0.792627	0.84088	0.820056	0.773489	0.71535	0.809919	0.779494	0.746022	0.685736	0.784708	0.860548	0.871842	0.785691	0.854354	0.828735	0.770332	0.709608	0.826835	0.791082	0.753437	0.681055	0.802856	0.874079	0.865395	0.782216	0.857603	0.796872	0.763795	0.708755	0.818729	0.788804	0.740547	0.683367	0.691481	0.694871	0.695077	0.684587	0.680642	0.681331	0.678548	0.665993	0.705206	0.692959	0.675888	0.65245	0.683747
269	0.76576	0.814331	0.844555	0.791056	0.841819	0.820463	0.776398	0.715724	0.812247	0.779203	0.747423	0.686517	0.786308	0.860197	0.870106	0.786765	0.856874	0.829032	0.770625	0.709378	0.825854	0.788245	0.751705	0.680881	0.801149	0.875978	0.865634	0.77952	0.855471	0.797444	0.764937	0.704145	0.818312	0.788402	0.740434	0.682178	0.690271	0.694032	0.693522	0.682265	0.682245	0.68105	0.679155	0.666346	0.705682	0.691915	0.676157	0.653125	0.682397
270	0.763626	0.81272	0.844936	0.78889	0.840214	0.819465	0.777013	0.716866	0.808019	0.779643	0.747335	0.684553	0.785249	0.861682	0.87236	0.78633	0.859222	0.830245	0.771609	0.709857	0.827328	0.788614	0.751357	0.678397	0.801312	0.875037	0.865366	0.78527	0.856126	0.797669	0.766226	0.707597	0.817959	0.788364	0.741311	0.682669	0.688604	0.693516	0.693243	0.682807	0.681748	0.683148	0.677163	0.667645	0.704971	0.690254	0.675511	0.653245	0.683292
271	0.765571	0.816235	0.842719	0.792954	0.842717	0.821129	0.776842	0.718366	0.809353	0.779194	0.750176	0.687515	0.786628	0.856383	0.870562	0.788191	0.859719	0.82872	0.770237	0.708532	0.827056	0.79003	0.751835	0.681474	0.801657	0.873453	0.869271	0.780795	0.854568	0.796766	0.765673	0.705242	0.817698	0.789036	0.741765	0.684685	0.689868	0.692441	0.694018	0.684526	0.682698	0.682398	0.678413	0.667044	0.706551	0.690607	0.675363	0.652352	0.684186
272	0.76448	0.814745	0.845676	0.790237	0.841371	0.823314	0.780178	0.71512	0.809084	0.779018	0.746531	0.687692	0.785071	0.862722	0.871137	0.786649	0.858694	0.830706	0.769829	0.711582	0.825444	0.789809	0.749655	0.681054	0.803312	0.875903	0.867599	0.779469	0.856302	0.799719	0.764393	0.706815	0.819239	0.789399	0.740948	0.685558	0.692434	0.692687	0.692666	0.683049	0.68147	0.682773	0.678637	0.666523	0.706445	0.691774	0.674302	0.653397	0.682132
273	0.766768	0.815712	0.845818	0.792838	0.842862	0.81965	0.775578	0.714159	0.807353	0.781804	0.747715	0.685203	0.786078	0.858099	0.873627	0.787764	0.857165	0.829836	0.771322	0.709396	0.827082	0.788549	0.754945	0.680421	0.801674	0.874508	0.865266	0.782688	0.858228	0.798526	0.765224	0.705245	0.818093	0.788228	0.740659	0.686108	0.692138	0.691887	0.690993	0.682277	0.681681	0.682117	0.678148	0.665576	0.706068	0.689877	0.67685	0.656154	0.681518
274	0.765185	0.814214	0.845156	0.790047	0.843429	0.823493	0.775875	0.717629	0.811898	0.779922	0.746361	0.685153	0.784993	0.861146	0.871453	0.784332	0.858719	0.830299	0.768311	0.710025	0.827724	0.78986	0.749651	0.679184	0.800529	0.876728	0.865249	0.778577	0.855343	0.800698	0.763659	0.7071	0.818417	0.786852	0.74081	0.68517	0.692923	0.69235	0.689154	0.682006	0.682579	0.681201	0.676515	0.667702	0.707381	0.690312	0.676789	0.655414	0.682818
275	0.764949	0.81473	0.847913	0.793123	0.844311	0.821357	0.777295	0.716588	0.806634	0.779693	0.744892	0.687321	0.784635	0.860279	0.871118	0.784092	0.85955	0.829992	0.772952	0.711325	0.826411	0.790457	0.752639	0.680862	0.802788	0.877823	0.867273	0.781702	0.857603	0.797687	0.766961	0.706507	0.818949	0.788343	0.739968	0.684412	0.691576	0.690853	0.688306	0.683912	0.685203	0.679238	0.677599	0.66841	0.70879	0.691441	0.672904	0.653147	0.682569
276	0.765798	0.814618	0.84447	0.793631	0.839812	0.822195	0.777276	0.716162	0.811035	0.778837	0.746886	0.685944	0.785868	0.861033	0.872103	0.788371	0.856312	0.829319	0.773471	0.710996	0.82625	0.789534	0.751803	0.679888	0.802134	0.875452	0.868141	0.780689	0.856129	0.800224	0.763167	0.707672	0.819977	0.789655	0.74281	0.684817	0.692757	0.692966	0.691427	0.683848	0.680197	0.682242	0.677849	0.664905	0.705892	0.6917	0.674396	0.651541	0.682256
277	0.766201	0.815813	0.846922	0.793	0.845428	0.821389	0.776155	0.717625	0.812504	0.780411	0.748086	0.687027	0.784	0.860568	0.870863	0.78682	0.85851	0.828544	0.773492	0.707155	0.827057	0.79053	0.752093	0.68183	0.801826	0.876761	0.866092	0.782958	0.855494	0.799443	0.764332	0.706152	0.819921	0.789786	0.742017	0.684049	0.693593	0.691127	0.690388	0.682098	0.678802	0.683892	0.675207	0.667193	0.704408	0.691073	0.674802	0.653558	0.682446
278	0.763714	0.816357	0.846316	0.791699	0.839091	0.819582	0.775778	0.71439	0.808284	0.779285	0.748213	0.687968	0.786733	0.85881	0.873379	0.787005	0.859097	0.830104	0.770775	0.710902	0.826589	0.789357	0.753626	0.679055	0.801227	0.876755	0.866583	0.781288	0.856923	0.800262	0.764064	0.707642	0.818885	0.786937	0.740534	0.682335	0.694813	0.695183	0.691572	0.684361	0.679958	0.681078	0.675965	0.668011	0.708848	0.690977	0.674791	0.654295	0.679586
279	0.764785	0.816287	0.847467	0.788255	0.845351	0.8268	0.775028	0.716125	0.809561	0.781449	0.746883	0.687078	0.784401	0.86125	0.871455	0.786796	0.858675	0.830392	0.772679	0.711238	0.826911	0.790345	0.752567	0.68237	0.803056	0.875228	0.867556	0.78014	0.856744	0.801358	0.765023	0.707002	0.818686	0.786907	0.740982	0.683958	0.693503	0.693663	0.690656	0.684927	0.681402	0.683427	0.676821	0.667712	0.70659	0.691018	0.675289	0.655917	0.680238
280	0.765583	0.815103	0.844069	0.791181	0.842565	0.819862	0.776612	0.714627	0.810143	0.781802	0.746447	0.686962	0.784677	0.860371	0.876697	0.78453	0.859417	0.83203	0.769823	0.712461	0.827098	0.790543	0.7518	0.680314	0.8042	0.876729	0.865507	0.780742	0.856198	0.798211	0.765062	0.70823	0.818601	0.786362	0.739069	0.685617	0.694858	0.69283	0.691079	0.683994	0.68285	0.684574	0.678583	0.667158	0.702495	0.689167	0.675154	0.655071	0.681804
281	0.764567	0.813753	0.848512	0.79252	0.845985	0.819245	0.773726	0.719659	0.809914	0.78092	0.74283	0.6837	0.783804	0.861291	0.874806	0.782329	0.859228	0.829078	0.772097	0.708584	0.827964	0.791145	0.752125	0.681439	0.802167	0.876237	0.868037	0.784696	0.856942	0.800732	0.765443	0.708036	0.818192	0.785369	0.742111	0.684863	0.693643	0.694195	0.691456	0.682714	0.680415	0.683297	0.677235	0.668222	0.706087	0.690746	0.674308	0.654501	0.681109
282	0.766698	0.814751	0.843965	0.793624	0.843458	0.825087	0.780035	0.716632	0.809202	0.781803	0.7475	0.686556	0.783885	0.861232	0.873131	0.784653	0.858204	0.832283	0.772624	0.71276	0.827362	0.789554	0.753181	0.679219	0.801744	0.876636	0.869581	0.781934	0.855771	0.798645	0.766845	0.707621	0.818286	0.788442	0.743623	0.683853	0.692998	0.692777	0.692702	0.681835	0.681696	0.683018	0.678986	0.669148	0.706918	0.691898	0.67468	0.655235	0.67993
283	0.763582	0.815984	0.848453	0.791889	0.843609	0.819622	0.776146	0.717443	0.809609	0.780349	0.748147	0.689876	0.785199	0.862377	0.872989	0.785723	0.857151	0.830202	0.77216	0.711885	0.826354	0.790356	0.753865	0.681136	0.80303	0.875666	0.866711	0.781483	0.857326	0.800864	0.766232	0.706854	0.81922	0.788221	0.741757	0.683061	0.694305	0.693717	0.692306	0.684175	0.681595	0.684551	0.675853	0.668412	0.703909	0.690331	0.676188	0.655546	0.681756
284	0.766769	0.8173	0.844179	0.792826	0.841561	0.824546	0.776331	0.715805	0.811192	0.780981	0.748488	0.68604	0.78322	0.860606	0.872482	0.787291	0.859838	0.830851	0.770776	0.71003	0.826374	0.789067	0.752106	0.680797	0.80273	0.877904	0.865291	0.784454	0.859945	0.800632	0.765658	0.706635	0.821297	0.788593	0.74141	0.684276	0.695145	0.69486	0.693211	0.685231	0.682728	0.682555	0.678512	0.66638	0.706747	0.689155	0.675954	0.654051	0.680689
285	0.763685	0.814228	0.847698	0.7932	0.845216	0.822939	0.774735	0.714804	0.811449	0.780894	0.747888	0.684605	0.786347	0.862382	0.872191	0.785145	0.85926	0.827875	0.770159	0.711335	0.826781	0.791895	0.753358	0.680921	0.803177	0.879833	0.869262	0.778623	0.858632	0.798314	0.763058	0.707465	0.82072	0.788989	0.739178	0.685803	0.693846	0.698061	0.692977	0.685826	0.683866	0.681366	0.677456	0.665145	0.706538	0.689882	0.674976	0.654671	0.678374
286	0.767401	0.817281	0.844786	0.791746	0.84267	0.823007	0.777634	0.718259	0.812399	0.779352	0.747078	0.686868	0.783249	0.86095	0.873365	0.785861	0.859222	0.830338	0.772287	0.710658	0.827868	0.791226	0.751805	0.679774	0.802616	0.878224	0.86925	0.783968	0.858089	0.800832	0.763632	0.708411	0.819994	0.787581	0.741232	0.685218	0.694859	0.697054	0.692079	0.685527	0.683033	0.684658	0.676216	0.66644	0.705332	0.691096	0.673248	0.656872	0.680326
287	0.765662	0.817317	0.846335	0.794132	0.845014	0.819778	0.778488	0.718456	0.812907	0.780085	0.749509	0.68788	0.783186	0.862729	0.874596	0.784628	0.860666	0.827183	0.7745	0.712031	0.826253	0.789884	0.751466	0.679836	0.801839	0.877723	0.86786	0.781642	0.858773	0.799104	0.76582	0.709389	0.817589	0.78887	0.741834	0.685253	0.696673	0.696808	0.691292	0.684195	0.68002	0.683624	0.679933	0.666676	0.706051	0.689912	0.674538	0.655909	0.682026
288	0.766709	0.813659	0.847014	0.794942	0.842147	0.826827	0.781244	0.719036	0.811742	0.780896	0.74631	0.686329	0.784902	0.862105	0.873622	0.785148	0.861382	0.832163	0.774397	0.710852	0.826127	0.78968	0.755213	0.67991	0.802575	0.879693	0.868023	0.781629	0.85763	0.801662	0.764571	0.710244	0.820997	0.787926	0.739923	0.684064	0.695332	0.696558	0.692385	0.68632	0.681708	0.682657	0.678229	0.669134	0.709376	0.691727	0.673545	0.654456	0.682019
289	0.764498	0.816431	0.846567	0.792681	0.844793	0.818891	0.776181	0.717472	0.809708	0.780768	0.746065	0.686826	0.785091	0.862492	0.875471	0.784609	0.860854	0.830975	0.774213	0.710261	0.827661	0.790499	0.749548	0.682421	0.802036	0.877936	0.868698	0.781797	0.857959	0.800997	0.763916	0.707807	0.821106	0.788006	0.739966	0.68329	0.696424	0.69431	0.692021	0.683012	0.682854	0.68223	0.67802	0.666764	0.705978	0.690428	0.672046	0.65453	0.684607
290	0.767816	0.816196	0.844066	0.791153	0.844709	0.821553	0.778741	0.719354	0.813734	0.781079	0.749205	0.689795	0.783511	0.860601	0.874813	0.785028	0.861632	0.829328	0.772303	0.707258	0.828185	0.792244	0.754842	0.679181	0.801548	0.880294	0.866852	0.783338	0.857749	0.799474	0.761418	0.709114	0.82097	0.787937	0.739653	0.685704	0.69659	0.696174	0.692079	0.684563	0.681873	0.682696	0.678078	0.666472	0.707368	0.68891	0.675781	0.653797	0.68527
291	0.767002	0.81483	0.845829	0.792801	0.843062	0.818686	0.775711	0.716427	0.810604	0.783638	0.750418	0.687356	0.786331	0.865032	0.878175	0.787694	0.861055	0.828374	0.772311	0.710372	0.827991	0.790324	0.752087	0.681372	0.803094	0.8817	0.866826	0.781901	0.861162	0.800409	0.764397	0.707853	0.821709	0.788383	0.740982	0.685587	0.699283	0.694761	0.693422	0.685283	0.682035	0.683682	0.676618	0.667645	0.709502	0.69162	0.676918	0.653651	0.683656
292	0.764073	0.815533	0.843387	0.790092	0.844229	0.825462	0.776631	0.71927	0.809591	0.780364	0.748546	0.686236	0.783878	0.859591	0.873814	0.786989	0.861257	0.829185	0.774203	0.710957	0.827372	0.790108	0.7556	0.679756	0.801775	0.877375	0.865575	0.781899	0.860799	0.798981	0.762441	0.708215	0.821537	0.788364	0.742083	0.685417	0.697738	0.693542	0.690783	0.685204	0.682596	0.681498	0.677783	0.667096	0.708844	0.68999	0.67564	0.652645	0.683935
293	0.765808	0.817606	0.847236	0.794009	0.845359	0.822032	0.777043	0.71685	0.815757	0.781643	0.74648	0.685996	0.785571	0.863989	0.877518	0.786821	0.861286	0.830111	0.77049	0.710769	0.827687	0.791036	0.751499	0.682722	0.801972	0.878808	0.867094	0.781555	0.858165	0.799441	0.766202	0.708468	0.820736	0.788889	0.741444	0.68567	0.697053	0.694067	0.690157	0.686204	0.68281	0.683313	0.678372	0.667115	0.705952	0.69126	0.675334	0.654978	0.683646
294	0.765063	0.816091	0.846123	0.792157	0.842487	0.823105	0.779041	0.716614	0.811253	0.78064	0.747205	0.687045	0.785842	0.860037	0.8748	0.78668	0.861138	0.831786	0.77407	0.71097	0.828028	0.790992	0.751213	0.679979	0.804119	0.882423	0.868689	0.783046	0.859532	0.799102	0.766981	0.707664	0.82048	0.788833	0.742992	0.684413	0.694025	0.692755	0.691202	0.686309	0.681176	0.683283	0.679899	0.665387	0.706877	0.689951	0.674239	0.653012	0.683275
295	0.767058	0.815877	0.847616	0.793554	0.842832	0.822199	0.777943	0.718814	0.812731	0.781144	0.746233	0.687063	0.785984	0.863243	0.875388	0.788013	0.862591	0.830848	0.772631	0.711568	0.827784	0.790887	0.753416	0.680185	0.802547	0.88011	0.869395	0.781461	0.860506	0.800383	0.765682	0.709453	0.820013	0.787443	0.742525	0.683401	0.694734	0.693705	0.690905	0.686262	0.681128	0.685111	0.679664	0.667479	0.707757	0.6914	0.674847	0.653784	0.682524
296	0.765726	0.818308	0.844448	0.793089	0.840843	0.824166	0.7787	0.715653	0.810309	0.781556	0.751565	0.687257	0.784523	0.861659	0.875734	0.785147	0.861071	0.829875	0.772599	0.710472	0.826954	0.791143	0.752126	0.680284	0.801851	0.880061	0.865541	0.782086	0.86165	0.798668	0.763909	0.706606	0.821218	0.787633	0.741197	0.685481	0.696443	0.693591	0.692348	0.685617	0.682651	0.687041	0.679529	0.664852	0.706349	0.691763	0.673565	0.654319	0.680491
297	0.766515	0.815797	0.845404	0.790542	0.846822	0.826824	0.777987	0.716288	0.812112	0.778663	0.746569	0.684835	0.786016	0.864851	0.875568	0.7857	0.863996	0.829838	0.771225	0.71103	0.829001	0.791558	0.752914	0.681032	0.802856	0.882693	0.865275	0.781051	0.858515	0.800791	0.767008	0.710441	0.820995	0.788728	0.74001	0.685111	0.695678	0.69707	0.692918	0.685075	0.680008	0.687685	0.677551	0.665524	0.706701	0.689805	0.675606	0.654356	0.680731
298	0.767713	0.81817	0.843639	0.79219	0.840163	0.819582	0.778042	0.716809	0.812172	0.780783	0.750786	0.686947	0.783666	0.861932	0.875322	0.788044	0.863559	0.832928	0.772171	0.711337	0.828251	0.790954	0.75238	0.679877	0.802422	0.882892	0.868773	0.782188	0.859148	0.801485	0.765412	0.707066	0.821071	0.787964	0.741691	0.683722	0.697939	0.696158	0.689537	0.686761	0.681201	0.684239	0.678243	0.665354	0.709146	0.69259	0.676129	0.652852	0.681448
299	0.765475	0.817712	0.845688	0.793517	0.844932	0.822358	0.776919	0.717561	0.809362	0.780591	0.746901	0.689505	0.786037	0.862926	0.874466	0.786396	0.863222	0.82914	0.772635	0.711034	0.829351	0.793104	0.753244	0.679585	0.802135	0.881821	0.869207	0.782184	0.861127	0.801888	0.763342	0.709142	0.820689	0.787231	0.744043	0.685788	0.698189	0.694893	0.69192	0.686174	0.681239	0.683668	0.678627	0.667564	0.709486	0.694383	0.673897	0.652914	0.682004
300	0.766881	0.815633	0.846833	0.79166	0.845787	0.822272	0.776796	0.716684	0.811749	0.779724	0.749964	0.689272	0.784476	0.862998	0.873415	0.790261	0.863168	0.832663	0.770994	0.710658	0.826589	0.790698	0.752404	0.679755	0.802543	0.880637	0.867525	0.783318	0.858362	0.799776	0.767325	0.709983	0.820426	0.787089	0.742429	0.686467	0.697088	0.696243	0.693319	0.684667	0.684304	0.685623	0.678099	0.668258	0.707942	0.693781	0.672133	0.65377	0.682555
[truncated: 275 more columns]
